# Supplementary material for: Design of pulmonary rehabilitation programmes during acute exacerbations of COPD: a systematic review and network meta-analysis
Source: PubMed Central journal article supplement — Eur Respir Rev. 2020 Nov 18;29(158):200039. doi: 10.1183/16000617.0039-2020 (PMC9488534; doi:10.1183/16000617.0039-2020), 2020-11-18
Supplement: ERR-0039-2020_Table_S1.pdf [file ERR-0039-2020_Table_S1.pdf]

**Table S1** – Design of pulmonary rehabilitation programs during acute exacerbations of chronic obstructive pulmonary disease (n=42).

| Study and Country                             | Population                                                                                                                                                           | Timing & Setting                      | Type of intervention                | Duration and intensity of intervention                    | Duration and frequency of sessions | Outcomes and outcome measures                                                                                                                                                                                                                                                                               | Results                                                                                                                                                                                                                                                                                                                                                                                                                                                                                                                                                                                                                                                                                                                                                                                                 |
|-----------------------------------------------|----------------------------------------------------------------------------------------------------------------------------------------------------------------------|---------------------------------------|-------------------------------------|-----------------------------------------------------------|------------------------------------|-------------------------------------------------------------------------------------------------------------------------------------------------------------------------------------------------------------------------------------------------------------------------------------------------------------|---------------------------------------------------------------------------------------------------------------------------------------------------------------------------------------------------------------------------------------------------------------------------------------------------------------------------------------------------------------------------------------------------------------------------------------------------------------------------------------------------------------------------------------------------------------------------------------------------------------------------------------------------------------------------------------------------------------------------------------------------------------------------------------------------------|
| Kirsten et al., 1998 <sup>32</sup><br>Germany | Patients with AECOPD<br>EG: n=15; 80.0%♂;<br>62.3±9.1yrs; FEV <sub>1</sub><br>34.3±2.6%pred<br>CG: n=14; 100.0%♂;<br>65.6±11.8yrs; FEV <sub>1</sub><br>37.7±3.4%pred | 6-8 days after admission<br>Inpatient | EG: walk<br>CG: no regular exercise | EG: 10 days; ≥75% of treadmill walking distance<br>CG: NA | EG: 5 sessions/day<br>CG: NA       | Exercise capacity – 6MWD (m)<br><br>Exercise capacity – VO <sub>2</sub> (mL/kg/min)<br><br>Lung function – FEV <sub>1</sub> (%pred)<br><br>Lung function – Inspiratory capacity (L)<br><br>Vital signs & SpO <sub>2</sub> – Heart rate (bpm)<br><br>Vital signs & SpO <sub>2</sub> – Respiratory rate (cpm) | EG: Pre 237.0±28.0 vs Post 420.0±42.0, p<0.0001<br>CG: Pre 230.0±23.0 vs Post 255.0±27.0, p=0.004<br>EG vs CG, p<0.001<br>ES=5.0<br><br>At the same workload<br>EG: Pre 12.7±0.8 vs Post 10.6±0.6, p<0.001<br>CG: Pre 13.4±1.0 vs Post 12.8±0.8, p>0.05<br>EG vs CG, p<0.05<br>ES=-1.8<br><br>EG: Pre 34.3±2.6 vs Post 38.2±3.1, p=0.03<br>CG: Pre 37.7±3.4 vs Post 38.1±3.0, p>0.05<br>EG vs CG, p>0.05<br>ES=1.1<br><br>EG: Pre 2.0±0.7 vs Post 2.4±1.0, p<0.05<br>CG: Pre 2.1±0.8 vs Post 2.0±0.8, p>0.05<br>EG vs CG, p>0.05<br>ES=0.6<br><br>At the same workload<br>EG: Pre 112.1±2.0 vs Post 102.4±3.0, p=0.008<br>CG: Pre 107.9±3.3 vs Post 107.6±3.5, p>0.05<br>ES=-3.1<br><br>At the same workload<br>EG: Pre 24.5±1.5 vs Post 21.8±1.0, p=0.010<br>CG: Pre 26.0±1.3 vs Post 24.4±1.8, p>0.05 |

|                                   |                                                                                                                                                                               |                                       |                                                                                                                                                                                                                                                                                                              |                                                                                                                                                                                                                                                                                                                 |                                                |                                                                                                                                                                                                                                                                                                                                                                  |                                                                                                                                                                                                                                                                                                                                                                                                                                                                                                                                                                                                                  |
|-----------------------------------|-------------------------------------------------------------------------------------------------------------------------------------------------------------------------------|---------------------------------------|--------------------------------------------------------------------------------------------------------------------------------------------------------------------------------------------------------------------------------------------------------------------------------------------------------------|-----------------------------------------------------------------------------------------------------------------------------------------------------------------------------------------------------------------------------------------------------------------------------------------------------------------|------------------------------------------------|------------------------------------------------------------------------------------------------------------------------------------------------------------------------------------------------------------------------------------------------------------------------------------------------------------------------------------------------------------------|------------------------------------------------------------------------------------------------------------------------------------------------------------------------------------------------------------------------------------------------------------------------------------------------------------------------------------------------------------------------------------------------------------------------------------------------------------------------------------------------------------------------------------------------------------------------------------------------------------------|
|                                   |                                                                                                                                                                               |                                       |                                                                                                                                                                                                                                                                                                              |                                                                                                                                                                                                                                                                                                                 |                                                | Symptoms: Dyspnoea – modified Borg scale                                                                                                                                                                                                                                                                                                                         | ES=-0.8<br>At the same workload<br>EG: Pre 3.9±0.2 vs Post 2.7±0.2, p=0.002<br>CG: Pre 4.5±0.3 vs Post 4.2±0.4, p>0.05<br>EG vs CG, p<0.05<br>ES=-3.1                                                                                                                                                                                                                                                                                                                                                                                                                                                            |
|                                   |                                                                                                                                                                               |                                       |                                                                                                                                                                                                                                                                                                              |                                                                                                                                                                                                                                                                                                                 |                                                | Symptoms: Dyspnoea – Transition Dyspnoea Index score                                                                                                                                                                                                                                                                                                             | EG: p<0.001<br>CG: p<0.002<br>EG vs CG, p<0.05                                                                                                                                                                                                                                                                                                                                                                                                                                                                                                                                                                   |
| Nava, 1998 <sup>37</sup><br>Italy | Patients admitted in the RICU with AECOPD<br>EG: n=60; 63.3%♂; 65.0±6.0yrs; FEV <sub>1</sub> 31.0±12.0%pred<br>CG: n=20; 65.0%♂; 67.0±9.0yrs; FEV <sub>1</sub> 33.0±17.0%pred | 3-5 days after admission<br>Inpatient | EG: standard medical therapy plus stepwise PR – mobilization, lower limbs strength training, postural drainage and cough education (if needed), progressive ambulation, respiratory muscle training, cycling, climb stairs and treadmill walking<br>CG: standard medical therapy plus progressive ambulation | Until discharge<br>EG: Respiratory muscle training – 50% of maximal inspiratory pressure; Cycling – 15W, dyspnoea <6 at modified Borg scale; Treadmill walking – 70% of the load achieve at incremental test<br>Progression: organized in 4 levels of training; based on patient's clinical condition<br>CG: NS | EG: 2 sessions/day; 30-45min/session<br>CG: NS | Exercise capacity – 6MWD (m)<br><br>Muscle strength – Maximal inspiratory pressure (cmH <sub>2</sub> O)<br><br>Lung function – FEV <sub>1</sub> (%pred)<br><br>Vital signs & SpO <sub>2</sub> – Heart rate (bpm)<br><br>Symptoms: Dyspnoea – Visual Analog Scale<br><br>Length of hospitalization – No of days in the RICU<br><br>Mortality – No (%) of patients | EG: Pre vs Post, p<0.001<br>CG: Pre vs Post, p>0.05<br>EG vs CG, p<0.001<br><br>EG: Pre 45.0±12.0 vs Post 61.0±14.0, p<0.05<br>ES=1.2<br><br>EG: Pre 34.0±13.0 vs Post 38.0±11.0, p>0.05<br>CG: Pre 36.0±11.0 vs Post 40.0±13.0, p>0.05<br>EG vs CG, p>0.05<br>ES=0.0<br><br>At rest<br>EG: Pre 91.0±12.0 vs Post 80.0±9.0, p<0.05<br>CG: Pre 95.0±13.0 vs Post 83.0±7.0, p<0.05<br>ES=0.1<br><br>EG: Pre vs Post, p<0.001<br>CG: Pre vs Post, p<0.05<br>EG vs CG, p<0.01<br><br>EG 38.1±14.3 vs CG 33.2±11.7, p>0.05<br>ES=0.4<br><br>During hospitalization<br>EG 12 (20.0%) vs CG 4 (20.0%), p>0.05<br>OR=1.0 |

|                                               |                                                                                                                                                                                                          |                                                                                       |                                                                                                                                                                        |                                                                                                                                               |                                                                                  |                                                                                                                                                                                                                        |                                                                                                                                                                                                                                                                                                                                                                                                                                                                                                                                                                                    |
|-----------------------------------------------|----------------------------------------------------------------------------------------------------------------------------------------------------------------------------------------------------------|---------------------------------------------------------------------------------------|------------------------------------------------------------------------------------------------------------------------------------------------------------------------|-----------------------------------------------------------------------------------------------------------------------------------------------|----------------------------------------------------------------------------------|------------------------------------------------------------------------------------------------------------------------------------------------------------------------------------------------------------------------|------------------------------------------------------------------------------------------------------------------------------------------------------------------------------------------------------------------------------------------------------------------------------------------------------------------------------------------------------------------------------------------------------------------------------------------------------------------------------------------------------------------------------------------------------------------------------------|
| Bellone et al., 2002 <sup>54</sup><br>Italy   | Hypersecretive patients with acute hypercapnic respiratory failure due to AECOPD<br>EG: n=13; 61.5%♂; 65.0±7.8yrs; FEV <sub>1</sub> 0.9±0.4L<br>CG: n=14; 64.3%♂; 64.0±7.7yrs; FEV <sub>1</sub> 0.9±0.3L | Within 1h from the beginning of non-invasive positive pressure ventilation; Inpatient | EG: assisted coughing plus PEP mask<br>CG: assisted coughing                                                                                                           | 3 days                                                                                                                                        | 3 sessions/day; 30-40min/session                                                 | Symptoms: Sputum – Production of sputum (g)<br><br>Mortality – No of patients                                                                                                                                          | EG: Post 9.6±3.9 vs Post <sub>1h</sub> 13.2±4.1, p<0.05<br>CG: Post 4.7±2.5 vs Post <sub>1h</sub> 5.2±1.9, p>0.05<br>EG vs CG: Post p<0.01<br>ES=1.0<br><br>During hospitalization<br>EG 0 vs CG 1, p>0.05<br>OR=0.3                                                                                                                                                                                                                                                                                                                                                               |
| Hernandez et al., 2003 <sup>56</sup><br>Spain | Patients admitted with AECOPD<br>EG: n=121; 96.7%♂; 71.0±9.9yrs; FEV <sub>1</sub> 43.0%pred<br>CG: n=101; 97.0%♂; 70.5±9.4yrs; FEV <sub>1</sub> 41.0%pred                                                | EG: Within 24h of discharge; Home<br>CG: NS                                           | EG: usual care plus home-based hospitalization (i.e., sputum clearance, education, upper and lower limbs training)<br>CG: usual care (i.e., pharmacological treatment) | EG: 8 weeks; ≤5 home visits plus phone calls (number of nurse visits 1.66±1.03 [range 0-4]; number of phone calls 2.33±2.05 [0-10])<br>CG: NS | EG: first session 1h, following sessions duration decided by the nurse<br>CG: NS | HRQoL – SGRQ score<br><br>HRQoL – SF-12 score<br><br>Length of hospitalization – No of days hospitalized<br>Hospital readmission – No (%) of patients<br><br>Mortality – No (%) of patients<br><br>Disease knowledge – | Symptoms score<br>Pre/Post change: EG -8.7 vs CG -8.4<br>Activity score<br>Pre/Post change: EG -4.8 vs CG -0.1<br>Impact score<br>Pre/Post change: EG -7.6 vs CG -1.9, p=0.03<br>Total score<br>Pre/Post change: EG -6.9 vs CG -2.4, p=0.05<br><br>Physical score<br>Pre/Post change: EG 1.7 vs CG 1.9<br>Mental score<br>Pre/Post change: EG 2.0 vs CG -0.1<br><br>EG 1.7±2.3 vs CG 4.2±4.1, p<0.001<br>ES=-0.8<br><br>At 2 months<br>EG 23 (20.0%) vs CG 26 (27.7%), p>0.05<br>OR=0.7<br><br>At 2 months<br>EG 5 (4.1%) vs CG 7 (6.9%)<br>OR=0.6<br><br>Improvement in knowledge |

|                                                             |                                                                                                                                                                                                                                                                                                                                                                                                                                                  |                                                                                       |                                                                                                                                                                                                                                                                        |                                                  |                                   | % of patients                                             | EG 58.0% vs CG 27.0%, p<0.01<br>OR=3.8                                                                                                                                                                                                                                                                                                                                                                                                                                                                                                                                                                                                                                                       |
|-------------------------------------------------------------|--------------------------------------------------------------------------------------------------------------------------------------------------------------------------------------------------------------------------------------------------------------------------------------------------------------------------------------------------------------------------------------------------------------------------------------------------|---------------------------------------------------------------------------------------|------------------------------------------------------------------------------------------------------------------------------------------------------------------------------------------------------------------------------------------------------------------------|--------------------------------------------------|-----------------------------------|-----------------------------------------------------------|----------------------------------------------------------------------------------------------------------------------------------------------------------------------------------------------------------------------------------------------------------------------------------------------------------------------------------------------------------------------------------------------------------------------------------------------------------------------------------------------------------------------------------------------------------------------------------------------------------------------------------------------------------------------------------------------|
|                                                             |                                                                                                                                                                                                                                                                                                                                                                                                                                                  |                                                                                       |                                                                                                                                                                                                                                                                        |                                                  |                                   | Patients' satisfaction<br>– Questionnaire score           | At 8 weeks<br>EG 8.0 vs CG 7.5, p=0.03                                                                                                                                                                                                                                                                                                                                                                                                                                                                                                                                                                                                                                                       |
| Yohannes et al.,<br>2003 <sup>52</sup><br>United<br>Kingdom | Patients admitted<br>with AECOPD<br>EG <sub>1</sub> : n=26; 50.0%♂ <sup>†</sup> ;<br>75.0±7.0yrs; FEV <sub>1</sub><br>38.0±11.0%pred<br>EG <sub>2</sub> : n=28; 53.6%♂ <sup>†</sup> ;<br>75.0±7.0yrs; FEV <sub>1</sub><br>38.0±15.0%pred<br>EG <sub>3</sub> : n=28; 42.9%♂ <sup>†</sup> ;<br>74.0±8.0yrs; FEV <sub>1</sub><br>38.0±11.0%pred<br>EG <sub>4</sub> : n=28; 67.9%♂ <sup>†</sup> ;<br>74.0±7.0yrs; FEV <sub>1</sub><br>39.0±10.0%pred | At least 2 days after<br>admission and when<br>acute phase had<br>passed<br>Inpatient | Walking in the ward<br>EG <sub>1</sub> : gutter frame<br>with supplemental<br>oxygen<br>EG <sub>2</sub> : gutter frame<br>with supplemental<br>air<br>EG <sub>3</sub> : rollator with<br>supplemental<br>oxygen<br>EG <sub>4</sub> : rollator with<br>supplemental air | Until discharge<br>Within limits of<br>tolerance | 3 sessions/day;<br>≤15min/session | Functionality –<br>Barthel index                          | EG <sub>1</sub> : Pre 16.2±2.4 vs Post<br>17.4±2.2<br>EG <sub>2</sub> : Pre 16.3±2.4 vs Post<br>17.9±2.2<br>EG <sub>3</sub> : Pre 18.4±1.3 vs Post<br>19.0±1.2<br>EG <sub>4</sub> : Pre 17.9±1.8 vs Post<br>18.5±1.5<br>Between groups p>0.05<br>EG <sub>1</sub> vs EG <sub>2</sub> : ES=-0.2<br>EG <sub>1</sub> vs EG <sub>3</sub> : ES=0.3<br>EG <sub>1</sub> vs EG <sub>4</sub> : ES=0.3<br>EG <sub>2</sub> vs EG <sub>3</sub> : ES=0.5<br>EG <sub>2</sub> vs EG <sub>4</sub> : ES=0.5<br>EG <sub>3</sub> vs EG <sub>4</sub> : ES=0.0<br>Change Gutter frame (EG <sub>1</sub> and<br>EG <sub>2</sub> ) vs rollator (EG <sub>3</sub> and EG <sub>4</sub> ):<br>1.2±1.8 vs 0.6±0.9, p=0.003 |
|                                                             |                                                                                                                                                                                                                                                                                                                                                                                                                                                  |                                                                                       |                                                                                                                                                                                                                                                                        |                                                  |                                   | Symptoms: Perceived<br>exertion – Borg scale              | EG <sub>1</sub> : Pre 14.2±3.3 vs Post<br>13.4±3.5<br>EG <sub>2</sub> : Pre 14.1±2.7 vs Post<br>12.6±3.2<br>EG <sub>3</sub> : Pre 13.7±2.5 vs Post<br>12.1±2.6<br>EG <sub>4</sub> : Pre 12.2±2.8 vs Post<br>13.0±3.1<br>Between groups p>0.05<br>EG <sub>1</sub> vs EG <sub>2</sub> : ES=0.2<br>EG <sub>1</sub> vs EG <sub>3</sub> : ES=0.3<br>EG <sub>1</sub> vs EG <sub>4</sub> : ES=-0.5<br>EG <sub>2</sub> vs EG <sub>3</sub> : ES=0.0<br>EG <sub>2</sub> vs EG <sub>4</sub> : ES=-0.8<br>EG <sub>3</sub> vs EG <sub>4</sub> : ES=-0.9                                                                                                                                                   |
|                                                             |                                                                                                                                                                                                                                                                                                                                                                                                                                                  |                                                                                       |                                                                                                                                                                                                                                                                        |                                                  |                                   | Length of<br>hospitalization – No<br>of days hospitalized | EG <sub>1</sub> : 11.7±12.1<br>EG <sub>2</sub> : 10.0±11.4<br>EG <sub>3</sub> : 10.0±12.5<br>EG <sub>4</sub> : 8.9±12.5                                                                                                                                                                                                                                                                                                                                                                                                                                                                                                                                                                      |

|                                                        |                                                                                                                                                                                  |                                                                        |                                                                                                                                                                                                                                                                                                          |                       |                                                                                                                                                                |                                                           | Between groups p>0.05                                                                                                                                                                                                                                                                                                                                                                                                                                                                                    |
|--------------------------------------------------------|----------------------------------------------------------------------------------------------------------------------------------------------------------------------------------|------------------------------------------------------------------------|----------------------------------------------------------------------------------------------------------------------------------------------------------------------------------------------------------------------------------------------------------------------------------------------------------|-----------------------|----------------------------------------------------------------------------------------------------------------------------------------------------------------|-----------------------------------------------------------|----------------------------------------------------------------------------------------------------------------------------------------------------------------------------------------------------------------------------------------------------------------------------------------------------------------------------------------------------------------------------------------------------------------------------------------------------------------------------------------------------------|
|                                                        |                                                                                                                                                                                  |                                                                        |                                                                                                                                                                                                                                                                                                          |                       |                                                                                                                                                                |                                                           | EG <sub>1</sub> vs EG <sub>2</sub> : ES=0.1                                                                                                                                                                                                                                                                                                                                                                                                                                                              |
|                                                        |                                                                                                                                                                                  |                                                                        |                                                                                                                                                                                                                                                                                                          |                       |                                                                                                                                                                |                                                           | EG <sub>1</sub> vs EG <sub>3</sub> : ES=0.1                                                                                                                                                                                                                                                                                                                                                                                                                                                              |
|                                                        |                                                                                                                                                                                  |                                                                        |                                                                                                                                                                                                                                                                                                          |                       |                                                                                                                                                                |                                                           | EG <sub>1</sub> vs EG <sub>4</sub> : ES=0.2                                                                                                                                                                                                                                                                                                                                                                                                                                                              |
|                                                        |                                                                                                                                                                                  |                                                                        |                                                                                                                                                                                                                                                                                                          |                       |                                                                                                                                                                |                                                           | EG <sub>2</sub> vs EG <sub>3</sub> : ES=0.0                                                                                                                                                                                                                                                                                                                                                                                                                                                              |
|                                                        |                                                                                                                                                                                  |                                                                        |                                                                                                                                                                                                                                                                                                          |                       |                                                                                                                                                                |                                                           | EG <sub>2</sub> vs EG <sub>4</sub> : ES=0.1                                                                                                                                                                                                                                                                                                                                                                                                                                                              |
|                                                        |                                                                                                                                                                                  |                                                                        |                                                                                                                                                                                                                                                                                                          |                       |                                                                                                                                                                |                                                           | EG <sub>3</sub> vs EG <sub>4</sub> : ES=0.1                                                                                                                                                                                                                                                                                                                                                                                                                                                              |
|                                                        |                                                                                                                                                                                  |                                                                        |                                                                                                                                                                                                                                                                                                          |                       |                                                                                                                                                                |                                                           | At 1 month                                                                                                                                                                                                                                                                                                                                                                                                                                                                                               |
|                                                        |                                                                                                                                                                                  |                                                                        |                                                                                                                                                                                                                                                                                                          |                       |                                                                                                                                                                |                                                           | EG <sub>1</sub> : 6 (30.0%)                                                                                                                                                                                                                                                                                                                                                                                                                                                                              |
|                                                        |                                                                                                                                                                                  |                                                                        |                                                                                                                                                                                                                                                                                                          |                       |                                                                                                                                                                |                                                           | EG <sub>2</sub> : 4 (20.0%)                                                                                                                                                                                                                                                                                                                                                                                                                                                                              |
|                                                        |                                                                                                                                                                                  |                                                                        |                                                                                                                                                                                                                                                                                                          |                       |                                                                                                                                                                |                                                           | EG <sub>3</sub> : 6 (30.0%)                                                                                                                                                                                                                                                                                                                                                                                                                                                                              |
|                                                        |                                                                                                                                                                                  |                                                                        |                                                                                                                                                                                                                                                                                                          |                       |                                                                                                                                                                |                                                           | EG <sub>4</sub> : 4 (20.0%)                                                                                                                                                                                                                                                                                                                                                                                                                                                                              |
|                                                        |                                                                                                                                                                                  |                                                                        |                                                                                                                                                                                                                                                                                                          |                       |                                                                                                                                                                |                                                           | EG <sub>1</sub> vs EG <sub>2</sub> : OR=1.8                                                                                                                                                                                                                                                                                                                                                                                                                                                              |
|                                                        |                                                                                                                                                                                  |                                                                        |                                                                                                                                                                                                                                                                                                          |                       |                                                                                                                                                                |                                                           | EG <sub>1</sub> vs EG <sub>3</sub> : OR=1.1                                                                                                                                                                                                                                                                                                                                                                                                                                                              |
|                                                        |                                                                                                                                                                                  |                                                                        |                                                                                                                                                                                                                                                                                                          |                       |                                                                                                                                                                |                                                           | EG <sub>1</sub> vs EG <sub>4</sub> : OR=1.8                                                                                                                                                                                                                                                                                                                                                                                                                                                              |
|                                                        |                                                                                                                                                                                  |                                                                        |                                                                                                                                                                                                                                                                                                          |                       |                                                                                                                                                                |                                                           | EG <sub>2</sub> vs EG <sub>3</sub> : OR=0.6                                                                                                                                                                                                                                                                                                                                                                                                                                                              |
|                                                        |                                                                                                                                                                                  |                                                                        |                                                                                                                                                                                                                                                                                                          |                       |                                                                                                                                                                |                                                           | EG <sub>2</sub> vs EG <sub>4</sub> : OR=1.0                                                                                                                                                                                                                                                                                                                                                                                                                                                              |
|                                                        |                                                                                                                                                                                  |                                                                        |                                                                                                                                                                                                                                                                                                          |                       |                                                                                                                                                                |                                                           | EG <sub>3</sub> vs EG <sub>4</sub> : OR=1.6                                                                                                                                                                                                                                                                                                                                                                                                                                                              |
| Man et al.,<br>2004 <sup>35</sup><br>United<br>Kingdom | Patients admitted<br>with AECOPD<br>EG: n=21; 42.9%♂;<br>69.6±9.2yrs; FEV <sub>1</sub><br>41.7±18.9%pred<br>CG: n=21; 38.1%♂;<br>70.7±9.3yrs; FEV <sub>1</sub><br>36.7±14.9%pred | EG: within 10 days<br>of hospital<br>discharge;<br>Community<br>CG: NS | EG: early PR<br>program – aerobic<br>walking and cycling,<br>upper and lower<br>limb strength<br>training, education;<br>individualized home<br>exercise program;<br>home diaries with<br>disease specific<br>information<br>CG: usual care plus<br>home diaries with<br>disease specific<br>information | EG: 8 weeks<br>CG: NS | EG: 2<br>sessions/week;<br>2h/session (i.e., 1h<br>of exercise plus 1h<br>of education); at<br>least 20min/day of<br>individualized<br>home exercise<br>CG: NS | Exercise capacity –<br>ISWT (m)<br><br>HRQoL – SGRQ score | EG: 120.0 [10.0; 330.0] vs Post<br>210.0 [40.0; 400.0]<br>CG: 115.0 [20.0; 190.0] vs Post<br>90.0 [10.0; 250.0]<br>EG vs CG, p<0.001<br><br>Symptoms score<br>EG: Pre 73.1±18.2 vs Post<br>69.1±16.7<br>CG: Pre 77.7±14.6 vs Post<br>76.8±15.4<br>EG vs CG, p=0.48<br>ES=-0.2<br>Activity score<br>EG: Pre 81.3±15.1 vs Post<br>70.5±19.6<br>CG: Pre 87.4±8.7 vs Post<br>84.6±15.0<br>EG vs CG, p=0.10<br>ES=-0.5<br>Impact score<br>EG: Pre 53.7±17.7 vs Post<br>30.8±16.9<br>CG: Pre 56.8±19.2 vs Post |

|                     |                                  |
|---------------------|----------------------------------|
|                     | 52.3±16.6                        |
|                     | EG vs CG, p=0.001                |
|                     | ES=-1.0                          |
|                     | Total score                      |
|                     | EG: Pre 65.4±14.1 vs Post        |
|                     | 49.3±15.3                        |
|                     | CG: 69.6±13.5 vs Post 66.2±13.6  |
|                     | EG vs CG, p=0.002                |
|                     | ES=-0.9                          |
| HRQoL – CRQ score   | Dyspnoea score                   |
|                     | EG: Pre 11.8±5.0 vs Post         |
|                     | 19.4±5.2                         |
|                     | CG: Pre 11.4±4.4 vs Post         |
|                     | 13.5±4.3                         |
|                     | EG vs CG, p=0.003                |
|                     | ES=1.1                           |
|                     | Fatigue score                    |
|                     | EG: Pre 9.9±2.8 vs Post 17.4±5.4 |
|                     | CG: Pre 11.6±6.1 vs Post         |
|                     | 13.8±5.1                         |
|                     | EG vs CG, p=0.004                |
|                     | ES=1.0                           |
|                     | Emotion score                    |
|                     | EG: Pre 21.1±5.8 vs Post         |
|                     | 32.5±7.2                         |
|                     | CG: Pre 27.0±12.6 vs Post        |
|                     | 29.7±11.4                        |
|                     | EG vs CG, p=0.008                |
|                     | ES=0.9                           |
|                     | Mastery score                    |
|                     | EG: Pre 10.8±4.8 vs Post         |
|                     | 20.7±5.0                         |
|                     | CG: Pre 13.6±7.4 vs Post         |
|                     | 16.1±7.0                         |
|                     | EG vs CG, p<0.001                |
|                     | ES=1.2                           |
| HRQoL – SF-36 score | Physical component score         |
|                     | EG: Pre 26.3±14.6 vs Post        |
|                     | 43.0±20.0                        |
|                     | CG: Pre 30.4±19.9 vs Post        |
|                     | 36.4±22.2                        |
|                     | EG vs CG, p=0.057                |

|                                              |                                                                                                                                                                                         |                                    |                                                                                                                                                                                                                                                                                        |                                                                          |                                                                                                               |                                                                                                                                                                                                                           |                                                                                                                                                                                                                                                                                                                                                                                                                                                                                                                                                                                                                                                                 |
|----------------------------------------------|-----------------------------------------------------------------------------------------------------------------------------------------------------------------------------------------|------------------------------------|----------------------------------------------------------------------------------------------------------------------------------------------------------------------------------------------------------------------------------------------------------------------------------------|--------------------------------------------------------------------------|---------------------------------------------------------------------------------------------------------------|---------------------------------------------------------------------------------------------------------------------------------------------------------------------------------------------------------------------------|-----------------------------------------------------------------------------------------------------------------------------------------------------------------------------------------------------------------------------------------------------------------------------------------------------------------------------------------------------------------------------------------------------------------------------------------------------------------------------------------------------------------------------------------------------------------------------------------------------------------------------------------------------------------|
|                                              |                                                                                                                                                                                         |                                    |                                                                                                                                                                                                                                                                                        |                                                                          |                                                                                                               |                                                                                                                                                                                                                           | ES=0.5<br>Mental component score<br>EG: Pre 30.6±14.2 vs Post 56.3±24.0<br>CG: Pre 41.6±21.9 vs Post 47.2±24.2<br>EG vs CG, p=0.02<br>ES=0.9                                                                                                                                                                                                                                                                                                                                                                                                                                                                                                                    |
|                                              |                                                                                                                                                                                         |                                    |                                                                                                                                                                                                                                                                                        |                                                                          |                                                                                                               | Hospital readmission – Rate of readmissions (%)                                                                                                                                                                           | At 3 months<br>EG 35.0 vs CG 57.1, p=0.30<br>OR=0.4                                                                                                                                                                                                                                                                                                                                                                                                                                                                                                                                                                                                             |
| Murphy et al., 2005 <sup>36</sup><br>Ireland | Patients discharge from the hospital due to AECOPD<br>EG: n=13; 53.8%♂; 67.0±9.7yrs; FEV <sub>1</sub> 38.0±12.0%pred<br>CG: n=13; 76.9%♂; 65.0±11.0yrs; FEV <sub>1</sub> 42.0±12.0%pred | EG: From discharge; Home<br>CG: NS | EG: supervised home exercise program, including aerobic training (step up/down stairs, sit/stand from a chair) and upper limb resistance training, plus home exercise diary<br>CG: standard medical treatment without any form of rehabilitation exercises or lifestyle changes advice | EG: 6 weeks; symptoms score between 3-5 at modified Borg scale<br>CG: NS | EG: 2 sessions/week; 30-40min/sessions; at least 15min/day of exercise at the days without sessions<br>CG: NA | Exercise capacity – ISWT (m)<br><br>Exercise capacity – 3min step test (s)<br><br>Muscle strength – handgrip (kg)<br><br>Muscle strength – knee extension kg (%)<br><br>Vital signs & SpO <sub>2</sub> – Heart rate (bpm) | EG: Pre 198.0±95.0 vs Post 304.0±136.0, p<0.001<br>CG: Pre 205.0±189.0 vs Post 215.0±185.0, p>0.05<br>ES=0.6<br><br>EG: Pre 119.0±41.0 vs Post 163.0±26.0, p<0.001<br>CG: Pre 129.0±50.0 vs Post 131.0±44.0, p>0.05<br>ES=1.0<br><br>Pre/Post change:<br>EG 1.0, p>0.05<br>CG p>0.05<br><br>Pre/Post change:<br>Right<br>EG 4.4 (25.0%), p>0.05<br>CG -1 to -2, p>0.05<br>Left<br>EG 5.7 (38.0%), p>0.05<br>CG -1 to -2, p>0.05<br><br>At ISWT<br>EG Pre 107.0±16.0 vs Post 102.0±36.0, p>0.05<br>CG Pre 117.0±14.0 vs Post 117.0±17.0, p>0.05<br>ES=-0.2<br><br>At 3min step test<br>EG Pre 112.0±13.0 vs Post 116.0±13.0, p>0.05<br>CG Pre 118.8±15.0 vs Post |

|                                                          |                                                                                                                                                                                                                                                                                                                                                                                  |
|----------------------------------------------------------|----------------------------------------------------------------------------------------------------------------------------------------------------------------------------------------------------------------------------------------------------------------------------------------------------------------------------------------------------------------------------------|
|                                                          | 113.0±10.0, p>0.05<br>ES=0.7                                                                                                                                                                                                                                                                                                                                                     |
| Vital signs & SpO <sub>2</sub> –<br>SpO <sub>2</sub> (%) | At ISWT<br>EG Pre 89.0±4.8 vs Post<br>91.0±2.6, p>0.05<br>CG Pre 91.0±5.1 vs Post<br>91.0±4.7, p>0.05<br>ES=0.4<br>At 3min step test<br>EG Pre 89.0±4.1 vs Post<br>91.0±3.0, p>0.05<br>CG Pre 91.0±4.0 vs Post<br>91.0±3.0, p>0.05<br>ES=0.6                                                                                                                                     |
| Symptoms: Dyspnoea<br>– modified Borg scale              | EG: Pre 0.2±0.6 vs Post 0.1±0.3,<br>p>0.05<br>CG: Pre 0.5±1.1 vs Post 0.0,<br>p>0.05<br>ES=0.6                                                                                                                                                                                                                                                                                   |
| Symptoms: Dyspnoea<br>– MRC score                        | EG: Pre 3.1±1.1 vs Post 1.8±0.9,<br>p<0.05<br>CG: Pre 2.8±1.1 vs Post 1.8±0.9,<br>p<0.05<br>ES=-0.3                                                                                                                                                                                                                                                                              |
| HRQoL – SGRQ score                                       | Symptoms score<br>EG: Pre 72.4±13.0 vs Post<br>74.0±9.2, p>0.05<br>CG: Pre 74.9±16.0 vs Post<br>67.2±17.3, p>0.05<br>ES=0.6<br>Activity score<br>EG: Pre 81.0±40.0 vs Post<br>55.7±23.0, p<0.05<br>CG: Pre 63.1±20.0 vs Post<br>52.4±29.0, p>0.05<br>ES=-0.5<br>Impact score<br>EG: Pre 63.0±17.7 vs Post<br>43.7±14.0, p<0.05<br>CG: Pre 44.7±20.0 vs Post<br>41.7±25.6, p>0.05 |



|                                                       |                                                                                                                                                                                        |                                          |                                                                                                                |                  |                                                             |                                                                                                                   |                                                                                                                                                                                                                             |
|-------------------------------------------------------|----------------------------------------------------------------------------------------------------------------------------------------------------------------------------------------|------------------------------------------|----------------------------------------------------------------------------------------------------------------|------------------|-------------------------------------------------------------|-------------------------------------------------------------------------------------------------------------------|-----------------------------------------------------------------------------------------------------------------------------------------------------------------------------------------------------------------------------|
|                                                       |                                                                                                                                                                                        |                                          |                                                                                                                |                  |                                                             |                                                                                                                   | ES=-0.8<br>Total score<br>EG: Pre 70.2±14.2 vs Post 52.4±15.0, p<0.05<br>CG: Pre 65.3±17.0 vs Post 56.5±24.0, p<0.05<br>ES=-0.5                                                                                             |
|                                                       |                                                                                                                                                                                        |                                          |                                                                                                                |                  |                                                             | HRQoL – EuroQol score                                                                                             | EG: Pre 0.7±0.2 vs Post 0.8±0.2, p<0.05<br>CG: Pre 0.7±0.2 vs Post 0.7±0.2, p>0.05<br>ES=0.9<br>Visual Analog Scale<br>EG: Pre 62.0±20.8 vs Post 79.0±12.6, p<0.05<br>CG: Pre 62.0±18.0 vs Post 69.0±27.0, p>0.05<br>ES=0.5 |
|                                                       |                                                                                                                                                                                        |                                          |                                                                                                                |                  |                                                             | New exacerbations – No of patients                                                                                | At 3 months<br>EG 0 vs CG 3, p=0.06<br>OR=0.1<br>At 6 months<br>EG 2 vs CG 5, p=0.10<br>OR=0.3                                                                                                                              |
| Casas et al., 2006 <sup>19</sup><br>Belgium and Spain | Patients discharge from the hospital due to AECOPD<br>EG: n=65; 76.9%♂; 70.0±9.0yrs; FEV <sub>1</sub> 43.0±20.0%pred<br>CG: n=90; 87.8%♂; 72.0±9.0yrs; FEV <sub>1</sub> 41.0±15.0%pred | At hospital discharge Inpatient and Home | EG: educational program, individual care plan, accessibility to case manager<br>CG: usual care                 | EG: NS<br>CG: NS | EG: face-to face sessions plus weekly phone calls<br>CG: NS | Hospital readmission – No of readmissions<br><br>Mortality – No (%) of patients                                   | At 12 months<br>EG 0.9±1.3 vs CG 1.3±1.7, p=0.028<br>HR=0.6, 95%CI (0.4-0.9), p=0.01<br><br>At 12 months<br>EG 12 (19.0%) vs CG 14 (16.0%), p=0.67<br>OR=1.2                                                                |
| Garcia-Aymerich et al., 2007 <sup>47</sup><br>Spain   | Patients admitted with AECOPD<br>EG: n=21; 80.0%♂; 72.0±10.0yrs; FEV <sub>1</sub> 1.2 [0.8; 1.4]L<br>CG: n=41; 90.0%♂; 73.0±9.0yrs; FEV <sub>1</sub>                                   | At hospital discharge Inpatient and Home | EG: usual care plus education, care plan and accessibility to case manager<br>CG: usual care, i.e., medication | EG: NS<br>CG: NS | EG: 2 face-to-face sessions plus phone calls<br>CG: NS      | Lung function – FEV <sub>1</sub> (L)<br><br>Lung function – FEV <sub>1</sub> /FVC<br><br>Physical activity levels | Pre/Post change: EG 0.0±0.1 vs CG 0.1±0.4, p=0.569<br>ES=-0.3<br><br>Pre/Post change: EG -0.8±8.2 vs CG -1.7±17.9, p=0.863<br>ES=0.1<br><br>At 12 months                                                                    |

|                                              |                                                                                                                                                                                                                                                                                                                                                                                     |
|----------------------------------------------|-------------------------------------------------------------------------------------------------------------------------------------------------------------------------------------------------------------------------------------------------------------------------------------------------------------------------------------------------------------------------------------|
| – No (%) of patients                         | <p>Any physical activity: EG 18 (86.0%) vs CG 34 (83.0%),<br/>p=0.778<br/>OR=1.2</p> <p>Regular walking or exercise: EG 18 (86.0 %) vs CG 32 (78.0%),<br/>p=0.470<br/>OR=1.7</p>                                                                                                                                                                                                    |
| Symptoms: Dyspnoea<br>– MRC score            | <p>Pre/Post change: EG -0.5±1.1 vs CG -0.2±1.4, p=0.299<br/>ES=0.0</p>                                                                                                                                                                                                                                                                                                              |
| HRQoL – SGRQ score                           | <p>Symptoms score<br/>Pre/Post change: EG -24.4±19.7 vs CG -17.1±24.4, p=0.243<br/>ES=-0.3</p> <p>Activity score<br/>Pre/Post change: EG -5.1±16.6 vs CG -8.4±20.0, p=0.523<br/>ES=0.2</p> <p>Impact score<br/>Pre/Post change: EG -13.7±15.6 vs CG -11.3±16.3, p=0.587<br/>ES=-0.1</p> <p>Total score<br/>Pre/Post change: EG -13.4±13.4 vs CG -11.0±15.6, p=0.560<br/>ES=-0.2</p> |
| HRQoL – EuroQol score                        | <p>Pre/Post change: EG 1.6±1.8 vs CG 0.9±2.1, p=0.273<br/>ES=0.3</p>                                                                                                                                                                                                                                                                                                                |
| Hospital readmission<br>– No of readmissions | <p>At 12 months<br/>EG 0.0 [0.0; 1.0] vs CG 1.0 [0.0; 1.0], p=0.083</p>                                                                                                                                                                                                                                                                                                             |
| Disease knowledge –<br>No (%) of patients    | <p>At 12 months</p> <p>Name of disease<br/>EG 17 (81.0%) vs CG 18 (44.0%),<br/>p=0.005<br/>OR=1.4</p> <p>Identification of AECOPD<br/>EG 17 (85.0%) vs CG 9 (22.0%),<br/>p&lt;0.001</p>                                                                                                                                                                                             |

|                                                  |                                                                                                                                                                                   |                                                                                                                                      |                                                                                                                 |                                               |                                                                                           |                                                                                                                                                                                                                                                                                                                              |                                                                                                                                                                                                                                                                                                                                                                                                                                                                                                                                                                                                                                                                                                                                                          |
|--------------------------------------------------|-----------------------------------------------------------------------------------------------------------------------------------------------------------------------------------|--------------------------------------------------------------------------------------------------------------------------------------|-----------------------------------------------------------------------------------------------------------------|-----------------------------------------------|-------------------------------------------------------------------------------------------|------------------------------------------------------------------------------------------------------------------------------------------------------------------------------------------------------------------------------------------------------------------------------------------------------------------------------|----------------------------------------------------------------------------------------------------------------------------------------------------------------------------------------------------------------------------------------------------------------------------------------------------------------------------------------------------------------------------------------------------------------------------------------------------------------------------------------------------------------------------------------------------------------------------------------------------------------------------------------------------------------------------------------------------------------------------------------------------------|
|                                                  |                                                                                                                                                                                   |                                                                                                                                      |                                                                                                                 |                                               |                                                                                           |                                                                                                                                                                                                                                                                                                                              | OR=15.1<br>Early treatment of AECOPD<br>EG 19 (90.0%) vs CG 27 (66.0%),<br>p=0.036<br>OR=4.9<br>At 12 months<br>EG 21 (100.0%) vs CG 34<br>(92.0%), p=0.180<br>OR=9.3                                                                                                                                                                                                                                                                                                                                                                                                                                                                                                                                                                                    |
| Eaton et al.,<br>2009 <sup>29</sup><br>Australia | Patients admitted<br>with AECOPD<br>EG: n=47; 45.0%♂;<br>70.1±10.3yrs; FEV <sub>1</sub><br>36.0±16.0%pred<br>CG: n=50; 42.0%♂;<br>69.7±9.4yrs; FEV <sub>1</sub><br>35.0±16.0%pred | EG: as soon as<br>medical appropriate<br>(2.6, 95% CI: 1.9–3.3<br>days after<br>admission);<br>Inpatient and<br>Outpatient<br>CG: NS | EG: PR program –<br>walking, upper and<br>lower limb<br>strengthening<br>exercises, education<br>CG: usual care | EG: until discharge<br>plus 8 weeks<br>CG: NS | EG: Inpatient –<br>30min/day;<br>Outpatient – 2<br>sessions/week,<br>1h/session<br>CG: NS | Exercise capacity –<br>6MWD (m)<br><br>Vital signs & SpO <sub>2</sub> –<br>SpO <sub>2</sub> (%)<br><br>Symptoms: Dyspnoea<br>– modified Borg scale<br><br>Symptoms: Dyspnoea<br>– mMRC score<br><br>Symptoms: Anxiety –<br>HADS score<br><br>Symptoms:<br>Depression – HADS<br>score<br><br>Disease severity –<br>BODE index | EG: Pre 249.0±141.0 vs Post<br>362.0±119.0, p<0.05<br>CG: Pre 218.0±118.0 vs Post<br>313.0±126.0, p<0.05<br>EG vs CG, p>0.05<br>ES=0.1<br>EG: Pre 93.6±2.4 vs Post<br>94.9±1.4<br>CG: Pre 92.4±3.6 vs Post<br>93.3±2.8<br>EG vs CG, p>0.05<br>ES=0.1<br>At rest<br>EG: Pre 1.4±1.2 vs Post 0.9±0.9<br>CG: Pre 1.8±1.3 vs Post 1.1±1.2<br>EG vs CG, p>0.05<br>ES=0.2<br>EG: Pre 2.1±1.2 vs Post 1.5±1.0<br>CG: Pre 2.3±1.2 vs Post 1.9±1.2<br>EG vs CG, p>0.05<br>ES=-0.2<br>EG: Pre 7.9±4.3 vs Post 4.6±3.4<br>CG: Pre 8.7±4.6 vs Post 7.2±4.9<br>EG vs CG, p=0.02<br>ES=-0.4<br>EG: Pre 5.6±3.0 vs Post 4.5±4.2<br>CG: Pre 6.5±4.4 vs Post 5.7±3.9<br>EG vs CG, p>0.05<br>ES=-0.1<br>EG: Pre 5.5±2.3 vs Post 3.7±1.9<br>CG: Pre 5.6±2.7 vs Post 4.5±2.5 |

|                                   |                                   |           |                                   |                       |                                      |                                          |                                                                                                                                                                                                                                                                                                                                                                                                                                                                                   |
|-----------------------------------|-----------------------------------|-----------|-----------------------------------|-----------------------|--------------------------------------|------------------------------------------|-----------------------------------------------------------------------------------------------------------------------------------------------------------------------------------------------------------------------------------------------------------------------------------------------------------------------------------------------------------------------------------------------------------------------------------------------------------------------------------|
|                                   |                                   |           |                                   |                       |                                      |                                          | EG vs CG, p>0.05<br>ES=-0.3                                                                                                                                                                                                                                                                                                                                                                                                                                                       |
|                                   |                                   |           |                                   |                       |                                      | HRQoL – CRQ score                        | Dyspnoea score<br>EG: Pre 3.0±1.4 vs Post 4.0±1.4<br>CG: Pre 3.2±1.4 vs Post 4.0±1.7<br>EG vs CG, p>0.05<br>ES=0.1<br>Fatigue score<br>EG: Pre 2.6±1.3 vs Post 4.4±1.2<br>CG: Pre 2.8±1.2 vs Post 3.8±1.5<br>EG vs CG, p=0.02<br>ES=0.6<br>Emotion score<br>EG: Pre 3.8±1.3 vs Post 4.9±1.4<br>CG: Pre 3.8±1.2 vs Post 4.4±1.5<br>EG vs CG, p<0.05<br>ES=0.4<br>Mastery score<br>EG: Pre 3.4±1.5 vs Post 5.1±1.6<br>CG: Pre 3.2±1.2 vs Post 4.6±1.6<br>EG vs CG, p<0.05<br>ES=0.2 |
|                                   |                                   |           |                                   |                       |                                      | HRQoL – SF-36 score                      | Physical component score<br>EG: Pre 27.0±7.2 vs Post 35.7±9.3<br>CG: Pre 29.0±7.9 vs Post 31.8±10.8<br>EG vs CG, p=0.04<br>ES=0.7<br>Mental component score<br>EG: Pre 41.8±8.8 vs Post 49.2±15.6<br>CG: Pre 39.2±11.2 vs Post 44.0±13.7<br>EG vs CG, p>0.05<br>ES=0.2                                                                                                                                                                                                            |
|                                   |                                   |           |                                   |                       |                                      | Hospital readmission – Risk (%)          | At 3 months<br>EG 16.0, 95%CI (0.0-32.0) vs CG 32.0, 95%CI (19.0-45.0)                                                                                                                                                                                                                                                                                                                                                                                                            |
| Kodric et al., 2009 <sup>48</sup> | Patients hospitalized with AECOPD | Inpatient | EG: standard medical therapy plus | EG: ELTGOL for 7 days | EG: 2 sessions/day; 30-40min/session | Lung function – FEV <sub>1</sub> (%pred) | EG: Pre 55.6±27.6 vs Post 64.4±34.0, p=0.001                                                                                                                                                                                                                                                                                                                                                                                                                                      |

| Country | EG: n; %♂; Mean±SD; FEV <sub>1</sub> %pred                     | CG: n; %♂; Mean±SD; FEV <sub>1</sub> %pred                     | Intervention                                                                                                   | CG: NA                            | Outcome | EG: Pre vs Post; p-value; ES                          | CG: Pre vs Post; p-value; ES                                | EG vs CG; p-value; ES                                                                                     |
|---------|----------------------------------------------------------------|----------------------------------------------------------------|----------------------------------------------------------------------------------------------------------------|-----------------------------------|---------|-------------------------------------------------------|-------------------------------------------------------------|-----------------------------------------------------------------------------------------------------------|
| Italy   | EG: n=30; 66.7%♂; 71.3±8.4yrs; FEV <sub>1</sub> 55.6±27.6%pred | CG: n=29; 72.4%♂; 69.1±8.3yrs; FEV <sub>1</sub> 52.3±18.7%pred | chest physiotherapy – ELTGOL<br>CG: standard medical therapy (i.e., steroids, bronchodilators and antibiotics) | Medical treatment until discharge | CG: NA  |                                                       | CG: Pre 52.3±18.7 vs Post 57.9±23.9, p=0.008                | EG vs CG, p=0.405<br>ES=0.1                                                                               |
|         |                                                                |                                                                |                                                                                                                |                                   |         | Lung function – FEV <sub>1</sub> /FVC                 | EG: Pre 50.9±13.1 vs Post 52.9±14.6, p=0.127                | CG: Pre 47.4±12.8 vs Post 47.4±14.2, p=0.823<br>EG vs CG, p=0.152<br>ES=0.1                               |
|         |                                                                |                                                                |                                                                                                                |                                   |         | Vital signs & SpO <sub>2</sub> – SpO <sub>2</sub> (%) | EG: Pre 90.0±6.3 vs Post 93.1±2.9, p=0.002                  | CG: 89.6±7.5 vs Post 92.1±3.4, p=0.030<br>EG vs CG, p=0.310<br>ES=0.1                                     |
|         |                                                                |                                                                |                                                                                                                |                                   |         | Symptoms: Dyspnoea – modified Borg scale              | EG: Pre 5.2±2.7 vs Post 3.0±1.8, p<0.001                    | CG: Pre 4.6±2.0 vs Post 4.3±1.5, p=0.074<br>EG vs CG, p=0.004<br>ES=-0.9                                  |
|         |                                                                |                                                                |                                                                                                                |                                   |         | Symptoms: Dyspnoea – MRC score                        | EG: Pre 2.9±1.3 vs Post 2.5±1.4, p=0.005                    | CG: Pre 3.0±1.2 vs Post 2.9±1.1, p=0.375<br>EG vs CG, p=0.332<br>ES=-0.2                                  |
|         |                                                                |                                                                |                                                                                                                |                                   |         | Symptoms: Sputum – Sputum production (mL/day)         | EG: Pre 19.5±17.2 vs Post 6.8±7.6, p<0.001                  | CG: 13.6±13.6 vs Post 8.2±9.4, p=0.001<br>Pre/Post change: EG 17.0±6.4 vs CG 10.2±9.7, p=0.076<br>ES=-0.6 |
|         |                                                                |                                                                |                                                                                                                |                                   |         | HRQoL – SGRQ score                                    | Total score<br>EG: Pre 59.1±17.3 vs Post 54.7±17.7, p=0.012 | CG: 57.4±18.7 vs Post 54.4±19.2, p=0.074<br>EG vs CG, p=0.961                                             |

|                                                      |                                                                                                                                                                     |                                                               |                                                                                                                                                                                                                                          |                       |                                                         |                                                                                                                                                                                                                                                                                                                 |                                                                                                                                                                                                                                                                                                                                                                                                                                                                                                                                                                                       |
|------------------------------------------------------|---------------------------------------------------------------------------------------------------------------------------------------------------------------------|---------------------------------------------------------------|------------------------------------------------------------------------------------------------------------------------------------------------------------------------------------------------------------------------------------------|-----------------------|---------------------------------------------------------|-----------------------------------------------------------------------------------------------------------------------------------------------------------------------------------------------------------------------------------------------------------------------------------------------------------------|---------------------------------------------------------------------------------------------------------------------------------------------------------------------------------------------------------------------------------------------------------------------------------------------------------------------------------------------------------------------------------------------------------------------------------------------------------------------------------------------------------------------------------------------------------------------------------------|
|                                                      |                                                                                                                                                                     |                                                               |                                                                                                                                                                                                                                          |                       |                                                         | Length of hospitalization – No of days hospitalized                                                                                                                                                                                                                                                             | ES=-0.1<br>EG 9.5±3.2 vs CG 10.0±2.4, p=0.530<br>ES=-0.2                                                                                                                                                                                                                                                                                                                                                                                                                                                                                                                              |
| Babu et al., 2010 <sup>25</sup><br>India             | Patients with AECOPD<br>EG: n=19; 73.7%♂; 65.0±15.9yrs; PEF 81.1±24.5L/min<br>CG: n=19; 68.4%♂; 58.0±13.3yrs; PEF 84.7±30.8L/min                                    | At the time of admission; Inpatient                           | EG: regular physical therapy plus on-call physical therapy<br>CG: only regular physical therapy – positioning, relaxation, breathing control, airway clearance techniques (active cycle breathing technique, huffing, assisted coughing) | Until discharge; NA   | EG: 2 sessions/day plus on demand<br>CG: 2 sessions/day | Exercise capacity – 6MWD (m)<br><br>Lung function – PEF (L/min)<br><br>Lung function – Sustained maximal inspiration (cc/s)<br><br>Symptoms: Dyspnoea – New York Heart Association functional grade<br><br>Symptoms: Perceived exertion – Borg scale<br><br>Length of hospitalization – No of days hospitalized | At discharge<br>EG: 387.9±110.1 vs CG: 289.7±103.2, p=0.004<br>ES=0.9<br><br>EG: Pre 81.1±24.5 vs Post 211.6±51.1<br>CG: Pre 94.7±30.8 vs Post 159.5±67.8<br>EG vs CG, p=0.01<br>ES=1.4<br><br>EG: Pre 321.1±196.0 vs Post 652.6±226.9<br>CG: Pre 368.4±292.6 vs Post 531.6±210.9<br>EG vs CG, p=0.09<br>ES=0.7<br><br>EG: Pre 3.6±0.5 vs Post 1.2±1.0<br>CG: Pre 3.3±0.7 vs Post 1.3±0.7<br>EG vs CG, p=0.695<br>ES=-0.5<br><br>EG: Pre 8.0±1.7 vs Post 2 [0.0; 6.0]<br>CG: Pre 7.0±2.0 vs Post 3 [0.0; 7.0]<br>EG vs CG, p=0.12<br><br>EG 4.3±2.5 vs CG 5.1±2.4, p=0.361<br>ES=-0.3 |
| Seymour et al., 2010 <sup>38</sup><br>United Kingdom | Patients admitted with AECOPD<br>EG: n=30; 43.3%♂; 67.0±10.0yrs; FEV <sub>1</sub> 52.0±20.0%pred<br>CG: n=30; 46.7%♂; 65.0±10.0yrs; FEV <sub>1</sub> 52.0±22.0%pred | EG: within 1 week of hospital discharge, Outpatient<br>CG: NS | EG: standard PR classes – exercise (limb strengthening and aerobic activities), education<br>CG: usual care                                                                                                                              | EG: 8 weeks<br>CG: NS | EG: 2 sessions/week, 2hours/session<br>CG: NS           | Exercise capacity – ISWT (m)<br><br>Exercise capacity – ESWT (m)                                                                                                                                                                                                                                                | EG: Pre 147.0±98.0 vs Post 216.0±126.0<br>CG: Pre 165.0±96.0 vs Post 183.0±98.0<br>EG vs CG, p<0.01<br>ES=0.5<br><br>EG: Pre 214.0±402.0 vs Post 402.0±400.0                                                                                                                                                                                                                                                                                                                                                                                                                          |

|                             |                                                                                                                                                                                                                                                                                                                                                                                                                                                                                                                     |
|-----------------------------|---------------------------------------------------------------------------------------------------------------------------------------------------------------------------------------------------------------------------------------------------------------------------------------------------------------------------------------------------------------------------------------------------------------------------------------------------------------------------------------------------------------------|
|                             | CG: Pre 224.0±175.0 vs Post 224.0±133.0<br>EG vs CG, p=0.02<br>ES=0.6                                                                                                                                                                                                                                                                                                                                                                                                                                               |
| Muscle strength – QMVC (kg) | EG: Pre 22.3±7.2 vs Post 26.2±8.9<br>CG: Pre 25.6±13.1 vs Post 24.4±13.2<br>EG vs CG, p<0.01<br>ES=0.5                                                                                                                                                                                                                                                                                                                                                                                                              |
| HRQoL – SGRQ score          | Symptoms score<br>EG: Pre 75.6±16.0 vs Post 74.9±15.4<br>CG: Pre 75.3±16.5 vs Post 77.6±15.5<br>EG vs CG, p=0.44<br>ES=-0.2<br>Activity score<br>EG: Pre 79.5±18.1 vs Post 69.6±19.4<br>CG: Pre 72.0±18.3 vs Post 76.2±15.4<br>EG vs CG, p=0.03<br>ES=-0.8<br>Impact score<br>EG: Pre 49.4±18.5 vs Post 43.2±15.8<br>CG: Pre 43.5±20.7 vs Post 48.0±19.3<br>EG vs CG, p=0.10<br>ES=-0.6<br>Total score<br>EG: Pre 64.1±16.9 vs Post 56.5±13.7<br>CG: Pre 57.4±16.8 vs Post 61.4±14.7<br>EG vs CG, p=0.02<br>ES=-0.7 |
| HRQoL – CRQ score           | Dyspnoea score<br>EG: Pre 2.3±0.8 vs Post 3.3±1.5<br>CG: Pre 2.3±1.1 vs Post 2.5±0.9<br>EG vs CG, p=0.03                                                                                                                                                                                                                                                                                                                                                                                                            |

|                                                 |                                                                                                                                                                   |                              |                                                                                                                                                        |                                                                                             |                                                      |                                                                                                                           |                                                                                                                                                                                                                                                                                                                                                                       |
|-------------------------------------------------|-------------------------------------------------------------------------------------------------------------------------------------------------------------------|------------------------------|--------------------------------------------------------------------------------------------------------------------------------------------------------|---------------------------------------------------------------------------------------------|------------------------------------------------------|---------------------------------------------------------------------------------------------------------------------------|-----------------------------------------------------------------------------------------------------------------------------------------------------------------------------------------------------------------------------------------------------------------------------------------------------------------------------------------------------------------------|
|                                                 |                                                                                                                                                                   |                              |                                                                                                                                                        |                                                                                             |                                                      |                                                                                                                           | ES=0.7<br>Fatigue score<br>EG: Pre 3.1±1.1 vs Post 3.6±1.4<br>CG: Pre 2.8±1.3 vs Post 3.1±1.3<br>EG vs CG, p=0.34<br>ES=0.2<br>Emotion score<br>EG: Pre 4.1±1.1 vs Post 4.8±1.4<br>CG: Pre 3.6±1.2 vs Post 3.8±1.5<br>EG vs CG, p=0.05<br>ES=0.4<br>Mastery score<br>EG: Pre 3.7±1.4 vs Post 4.5±1.2<br>CG: Pre 3.3±1.6 vs Post 4.0±1.6<br>EG vs CG, p=0.32<br>ES=0.1 |
|                                                 |                                                                                                                                                                   |                              |                                                                                                                                                        |                                                                                             |                                                      | HRQoL – EuroQol score                                                                                                     | Visual Analog Scale<br>EG: Pre 58.0±18.0 vs Post 68.0±17.0<br>CG: Pre 54.0±17.0 vs Post 61.0±15.0<br>EG vs CG, p=0.29<br>ES=0.2                                                                                                                                                                                                                                       |
|                                                 |                                                                                                                                                                   |                              |                                                                                                                                                        |                                                                                             |                                                      | New exacerbations – No (%) of patients                                                                                    | At 3 months<br>EG 8 (27.0%) vs CG 17 (57%),<br>p=0.02<br>OR=0.3, 95%CI (0.1-0.8)                                                                                                                                                                                                                                                                                      |
|                                                 |                                                                                                                                                                   |                              |                                                                                                                                                        |                                                                                             |                                                      | Hospital readmission – No (%) of patients                                                                                 | At 3 months<br>EG 2 (7.0%) vs CG 10 (33.0%),<br>p=0.02<br>OR=0.2, 95%CI (0.0-0.7)                                                                                                                                                                                                                                                                                     |
| Troosters et al., 2010 <sup>43</sup><br>Belgium | Patients admitted with AECOPD<br>EG: n=17; 76.5%♂; 67.0±8.0yrs; FEV <sub>1</sub> 40.0±12.0%pred<br>CG: n=19; 73.7%♂; 69.0±7.0yrs; FEV <sub>1</sub> 50.0±18.0%pred | Since admission<br>Inpatient | EG: usual care plus quadriceps resistance training<br>CG: usual care (i.e., medication, mucous secretion clearance techniques and breathing exercises) | EG: 7 days; 70% of 1RM; Progression: based on Borg scores of dyspnoea and fatigue<br>CG: NS | EG: 1 session/day; 3 sets of 8 repetitions<br>CG: NS | Exercise capacity – 6MWD (m)<br><br>Muscle strength – QMVC (%)<br><br>Length of hospitalization – No of days hospitalized | Pre/post change:<br>EG: 34.0 [14.0; 61.0], p=0.002<br>CG: 17.5 [-41.0; 62.0], p=0.59<br>EG vs CG, p=0.23<br><br>Pre/Post change: EG 9.7±16.0 vs CG -1.0±13.0, p=0.05<br>ES=0.7<br>EG 8.0 [8.0; 9.0] vs CG 8.0 [8.0; 14.0], p>0.05                                                                                                                                     |



|                                        |                                                                                                                                                                                |                                        |                                                                                                                                                                                                      |                                                                             |                                                                                 | Hospital readmission<br>– No of patients                                                                                                                                                                                                                 | At 6 months<br>EG 9 vs CG 8, p>0.05<br>OR=1.5                                                                                                                                                                                                                                                                                                                                                                                                                                                                                                                                                                                                                                                                                                                                                 |
|----------------------------------------|--------------------------------------------------------------------------------------------------------------------------------------------------------------------------------|----------------------------------------|------------------------------------------------------------------------------------------------------------------------------------------------------------------------------------------------------|-----------------------------------------------------------------------------|---------------------------------------------------------------------------------|----------------------------------------------------------------------------------------------------------------------------------------------------------------------------------------------------------------------------------------------------------|-----------------------------------------------------------------------------------------------------------------------------------------------------------------------------------------------------------------------------------------------------------------------------------------------------------------------------------------------------------------------------------------------------------------------------------------------------------------------------------------------------------------------------------------------------------------------------------------------------------------------------------------------------------------------------------------------------------------------------------------------------------------------------------------------|
| Ko et al., 2011<br>China <sup>33</sup> | Patients admitted with AECOPD<br>EG: n=30; 100.0%♂;<br>73.5±7.7yrs; FEV <sub>1</sub><br>46.2±19.7%pred<br>CG: n=30; 96.7%♂;<br>73.8±6.4yrs; FEV <sub>1</sub><br>40.8±17.5%pred | 2-3weeks after discharge<br>Outpatient | EG: PR program – treadmill, arm cycling, resistance training of upper and lower limbs; home exercise<br>CG: usual care, i.e., instructions to have regular exercise at home but no training sessions | EG: 8 weeks (at least 20 sessions); 60-70% of VO <sub>2</sub> máx<br>CG: NS | EG: 3 sessions/week; 2h/session; home exercise for at least 20min/day<br>CG: NS | Exercise capacity – 6MWD (m)<br><br>Exercise capacity – VO <sub>2</sub> máx (mL/kg/min)<br><br>Lung function – FEV <sub>1</sub> (%pred)<br><br>Symptoms: Dyspnoea – modified Borg scale<br><br>Symptoms: Dyspnoea – mMRC score<br><br>HRQoL – SGRQ score | EG: Pre 298.2±85.2 vs Post 328.8±85.2<br>CG: Pre 296.7±97.1 vs Post 313.2±76.8<br>EG vs CG, p=0.15<br>ES=0.2<br><br>EG: Pre 11.0±3.8 vs Post 12.7±4.6<br>CG: Pre 8.7±4.0 vs Post 11.1±5.0<br>EG vs CG, p=0.90<br>ES=-0.2<br><br>EG: Pre 46.2±19.7 vs Post 47.6±22.5<br>CG: Pre 40.8±17.5 vs Post 42.0±17.2<br>EG vs CG, p=0.24<br>ES=0.0<br><br>EG: Pre 2.6±1.9 vs Post 2.4±2.4<br>CG: Pre 3.4±2.2 vs Post 3.5±2.9<br>EG vs CG, p=0.27<br>ES=-0.1<br><br>EG: Pre 2.0±0.7 vs Post 2.9±0.9<br>CG: Pre 1.9±0.8 vs Post 3.1±0.8<br>EG vs CG, p=0.14<br>ES=-0.2<br><br>Symptoms score<br>EG: Pre 66.7±16.5 vs Post 52.2±17.3<br>CG: Pre 68.9±23.6 vs Post 52.4±19.4<br>EG vs CG, p=0.70<br>ES=-0.1<br>Activity score<br>EG: Pre 43.5±14.3 vs Post 50.5±27.7<br>CG: Pre 37.7±20.8 vs Post 63.1±26.7 |

|                                           |                                   |           |                                                   |                                                           |                                         |                                                   |                                                                                                                                                                                                                                                                                      |
|-------------------------------------------|-----------------------------------|-----------|---------------------------------------------------|-----------------------------------------------------------|-----------------------------------------|---------------------------------------------------|--------------------------------------------------------------------------------------------------------------------------------------------------------------------------------------------------------------------------------------------------------------------------------------|
|                                           |                                   |           |                                                   |                                                           |                                         |                                                   | EG vs CG, p=0.06<br>ES=-0.8<br>Impact score<br>EG: Pre 53.4±12.9 vs Post 30.3±20.5<br>CG: Pre 50.4±19.3 vs Post 36.0±18.3<br>EG vs CG, p=0.02<br>ES=-0.5<br>Total score<br>EG: Pre 61.1±15.8 vs Post 40.2±19.1<br>CG: Pre 57.2±16.9 vs Post 46.9±18.2<br>EG vs CG, p=0.01<br>ES=-0.6 |
|                                           |                                   |           |                                                   |                                                           |                                         | HRQoL – SF-36 score                               | Physical score<br>EG: Pre 54.5±17.4 vs Post 69.3±18.6<br>CG: Pre 57.1±19.3 vs Post 61.4±19.2<br>EG vs CG, p=0.05<br>ES=0.6<br>Mental score<br>EG: Pre 65.7±17.1 vs Post 73.2±18.2<br>CG: Pre 63.6±22.5 vs Post 72.4±23.5<br>EG vs CG, p=0.94<br>ES=-0.1                              |
|                                           |                                   |           |                                                   |                                                           |                                         | New exacerbations – No of exacerbations           | At 12 months<br>EG 1.6±1.7 vs CG 1.8±2.7, p=0.76<br>IRR=0.9, 95%CI (0.6-1.3), p=0.62                                                                                                                                                                                                 |
|                                           |                                   |           |                                                   |                                                           |                                         | Hospital readmission – No of readmissions         | At 12 months<br>EG 1.0±1.2 vs CG 1.0±1.9, p=0.47<br>IRR=1.0, 95%CI (0.6-1.6), p=0.90                                                                                                                                                                                                 |
| Cross et al. 2012 <sup>20</sup><br>United | Patients hospitalized with AECOPD | Inpatient | EG: guidance to perform active cycle of breathing | At least 1 session<br>EG: median 2, range [1-21] sessions | EG: median 11, range (1-41) min/session | Symptoms – Breathlessness, cough and sputum scale | EG: Pre 6.2±2.1 vs Post 5.6±3.0<br>CG: Pre 6.4±2.2 vs Post 5.7±2.8<br>EG vs CG, p=0.978                                                                                                                                                                                              |

|         |                                                                        |                                                                                                                                                                                                                           |        |        |                                   |                                                                                                                                                                                                                                                                                                                                                                                                                                                                                                                                             |
|---------|------------------------------------------------------------------------|---------------------------------------------------------------------------------------------------------------------------------------------------------------------------------------------------------------------------|--------|--------|-----------------------------------|---------------------------------------------------------------------------------------------------------------------------------------------------------------------------------------------------------------------------------------------------------------------------------------------------------------------------------------------------------------------------------------------------------------------------------------------------------------------------------------------------------------------------------------------|
| Kingdom | EG: n=258; 55.4%♂;<br>69.1±9.9yrs<br>CG: n=264; 58.7%♂;<br>69.6±9.5yrs | technique, advice<br>about positioning,<br>manual chest<br>therapy – percussion<br>and vibration<br>techniques<br>CG: guidance to<br>perform active cycle<br>of breathing<br>technique and<br>advice about<br>positioning | CG: NS | CG: NS |                                   | ES=0.0                                                                                                                                                                                                                                                                                                                                                                                                                                                                                                                                      |
|         |                                                                        |                                                                                                                                                                                                                           |        |        | HRQoL – SGRQ score                | Symptoms score<br>EG: Pre 79.2±14.4 vs Post<br>68.4±23.1<br>CG: Pre 79.6±14.2 vs Post<br>68.4±23.0<br>EG vs CG, p=0.695<br>ES=0.0<br>Activity score<br>EG: Pre 85.0±15.5 vs Post<br>82.5±18.8<br>CG: Pre 84.1±15.9 vs Post<br>80.9±19.7<br>EG vs CG, p=0.836<br>ES=0.0<br>Impact score<br>EG: Pre 56.6±19.1 vs Post<br>51.5±22.6<br>CG: Pre 57.6±18.9 vs Post<br>51.6±22.5<br>EG vs CG, p=0.822<br>ES=0.0<br>Total score<br>EG: Pre 68.9±14.7 vs Post<br>63.9±19.1<br>CG: Pre 69.1±14.8 vs Post<br>63.5±19.7<br>EG vs CG, p=0.753<br>ES=0.0 |
|         |                                                                        |                                                                                                                                                                                                                           |        |        | HRQoL – EuroQol<br>score          | EG: Pre 0.5±0.3 vs Post 0.5±0.3<br>CG: Pre 0.4±0.4 vs Post 0.5±0.4<br>EG vs CG, p=0.886<br>ES=0.0<br>Visual Analog Scale score<br>EG: Pre 45.0±21.0 vs Post<br>51.3±21.0<br>CG: Pre 46.6±21.4 vs Post<br>52.3±19.7<br>EG vs CG, p=0.297<br>ES=0.0                                                                                                                                                                                                                                                                                           |
|         |                                                                        |                                                                                                                                                                                                                           |        |        | Length of<br>hospitalization – No | EG 16.0±16.5 vs CG 17.0±18.0,<br>p=0.421                                                                                                                                                                                                                                                                                                                                                                                                                                                                                                    |

|                                                 |                                                                                                                                                                                                                                                                                                                               |                                                                                                                                 |                                                                                                                                                                                                                                                                                                                                                     |                                                                                                                                                                                                                                                                                                                                                      |                                                                                                                                                                                                                                                      |                                                                                                                                                                                   |                                                                                                                                                                                                                                                                                                                                                                                                                                                                                                                                                                                                                       |
|-------------------------------------------------|-------------------------------------------------------------------------------------------------------------------------------------------------------------------------------------------------------------------------------------------------------------------------------------------------------------------------------|---------------------------------------------------------------------------------------------------------------------------------|-----------------------------------------------------------------------------------------------------------------------------------------------------------------------------------------------------------------------------------------------------------------------------------------------------------------------------------------------------|------------------------------------------------------------------------------------------------------------------------------------------------------------------------------------------------------------------------------------------------------------------------------------------------------------------------------------------------------|------------------------------------------------------------------------------------------------------------------------------------------------------------------------------------------------------------------------------------------------------|-----------------------------------------------------------------------------------------------------------------------------------------------------------------------------------|-----------------------------------------------------------------------------------------------------------------------------------------------------------------------------------------------------------------------------------------------------------------------------------------------------------------------------------------------------------------------------------------------------------------------------------------------------------------------------------------------------------------------------------------------------------------------------------------------------------------------|
|                                                 |                                                                                                                                                                                                                                                                                                                               |                                                                                                                                 |                                                                                                                                                                                                                                                                                                                                                     |                                                                                                                                                                                                                                                                                                                                                      |                                                                                                                                                                                                                                                      | of days hospitalized                                                                                                                                                              | ES=-0.1                                                                                                                                                                                                                                                                                                                                                                                                                                                                                                                                                                                                               |
| Puhan et al., 2012 <sup>23</sup><br>Switzerland | Patients with AECOPD<br>EG <sub>1</sub> : n=19; 63.2%♂ <sup>1</sup> ;<br>67.5±9.8yrs; FEV <sub>1</sub><br>42.7±13.5%pred<br>EG <sub>2</sub> : n=17; 52.9%♂ <sup>1</sup> ;<br>66.5±6.2yrs; FEV <sub>1</sub><br>46.3±15.9%pred                                                                                                  | Inpatient and Outpatient<br>EG <sub>1</sub> : within 2 weeks<br>EG <sub>2</sub> : 6 months after randomization, at stable phase | PR program, i.e., exercise (endurance training, strength training and calisthenics) and education                                                                                                                                                                                                                                                   | 12 weeks (18-36 sessions)                                                                                                                                                                                                                                                                                                                            | NS                                                                                                                                                                                                                                                   | Symptoms: Dyspnoea – mMRC score<br><br>HRQoL – CRQ score<br><br><br><br><br><br><br><br>HRQoL – Feeling thermometer score<br><br><br>New exacerbations – No of exacerbations      | Difference between EG <sub>1</sub> and EG <sub>2</sub> at 6months:<br>0.8, 95%CI (0.1-1.6), p=0.028<br><br>Difference between EG <sub>1</sub> and EG <sub>2</sub> at 6months:<br>Dyspnoea score<br>-0.8, 95%CI (-2.0-0.3), p=0.14<br>Fatigue score<br>-0.4, 95%CI (-1.3-0.4), p=0.29<br>Emotion score<br>-0.2, 95%CI (-1.1-0.7), p=0.62<br>Mastery score<br>-0.5, 95%CI (-1.5-0.4), p=0.28<br><br>Difference between EG <sub>1</sub> and EG <sub>2</sub> at 6months:<br>-9.7, 95%CI (-24.7-5.3), p=0.20<br><br>At 18 months<br>EG <sub>1</sub> 2.6±3.0 vs EG <sub>2</sub> 2.8±3.4<br>IRR=1.0, 95%CI (0.5-1.9), p=0.91 |
| Tang et al., 2012 <sup>40</sup><br>Australia    | Patients admitted with AECOPD<br>EG <sub>1</sub> : n=11; 45.5%♂ <sup>1</sup> ;<br>68.0±10.1yrs; FEV <sub>1</sub><br>45.1±18.6%pred<br>EG <sub>2</sub> : n=10; 20.0%♂ <sup>1</sup> ;<br>73.6±10.0yrs; FEV <sub>1</sub><br>46.1±18.3%pred<br>CG: n=11; 54.5%♂ <sup>1</sup> ;<br>78.0±8.8yrs; FEV <sub>1</sub><br>46.8±20.4%pred | From the second day of admission<br>Inpatient                                                                                   | EG <sub>1</sub> : standard physiotherapy plus exercise – aerobic training (walking) and resistance training<br>EG <sub>2</sub> : standard physiotherapy plus exercise – aerobic training (walking) and resistance training<br>CG: standard physiotherapy treatment, i.e., sputum clearance techniques, mobility assessments and functional training | Until discharge<br>EG <sub>1</sub> : 40% of 3-minute walk test, 40% of 1RM<br>EG <sub>2</sub> : 70% of 3-minute walk test, 70% of 1RM<br>Progression:<br>Aerobic training – ↑10% walking distance if change in Borg ≤2, Resistance training – stronger elastic band if the patient completed 2sets of the prescribed number of repetitions<br>CG: NS | EG <sub>1</sub> : 2 exercise sessions/day, 15min/session plus 1 standard physiotherapy session/day<br>EG <sub>2</sub> : 2 exercise sessions/day, 15min/session plus 1 standard physiotherapy session/day<br>CG: 1 standard physiotherapy session/day | Exercise capacity – 3min walk test (m)<br><br><br><br><br><br><br><br>Muscle strength – upper limb<br><br><br>Lung function – FEV <sub>1</sub> (%pred)<br><br><br>Functionality – | Pre/Post change:<br>EG <sub>1</sub> : 21.0, 95%CI (11.0-30.0), p=0.001<br>EG <sub>2</sub> : 31.0, 95%CI (10.0-52.0), p=0.009<br>EG <sub>1</sub> vs CG: ES=0.4, 95%CI (-0.5-1.3)<br>EG <sub>1</sub> vs EG <sub>2</sub> : ES=0.6, 95%CI (-0.3-1.5)<br>Favours EG <sub>1</sub><br>EG <sub>1</sub> vs CG: ES=0.2, 95%CI (-0.7-1.0)<br>EG <sub>1</sub> vs EG <sub>2</sub> : ES=0.6, 95%CI (-0.3-1.5)<br>Pre/Post change:<br>EG <sub>1</sub> : 3.4, 95%CI (0.4-6.5), p=0.03<br>CG: 8.2, 95%CI (0.3-16.0), p=0.04<br><br>EG <sub>2</sub> : 6.9, 95%CI (0.1-13.7),                                                            |

|                                                      |                                                                                                                                                                                                         |                                                                                                               |                                                                                                                                                                                                |                                                                                                         |                                                |                                           |                                                                                                                                                                                                          |
|------------------------------------------------------|---------------------------------------------------------------------------------------------------------------------------------------------------------------------------------------------------------|---------------------------------------------------------------------------------------------------------------|------------------------------------------------------------------------------------------------------------------------------------------------------------------------------------------------|---------------------------------------------------------------------------------------------------------|------------------------------------------------|-------------------------------------------|----------------------------------------------------------------------------------------------------------------------------------------------------------------------------------------------------------|
|                                                      |                                                                                                                                                                                                         |                                                                                                               |                                                                                                                                                                                                |                                                                                                         |                                                | Barthel index                             | p=0.05<br>CG: 5.7, 95%CI (0.2-11.2),<br>p=0.04                                                                                                                                                           |
|                                                      |                                                                                                                                                                                                         |                                                                                                               |                                                                                                                                                                                                |                                                                                                         |                                                | Length of hospitalization                 | ES=-0.3, 95%CI (-0.6-1.2)<br>Favours EG <sub>2</sub>                                                                                                                                                     |
| Chaplin et al., 2013 <sup>27</sup><br>United Kingdom | Patients hospitalized with AECOPD<br>EG <sub>1</sub> : n=10; 50.0%♂;<br>65.4±6.2yrs; FEV <sub>1</sub> 39.8±26.7%pred<br>EG <sub>2</sub> : n=10; 50.0%♂;<br>70.6±7.8yrs; FEV <sub>1</sub> 43.1±20.0%pred | Inpatient<br>EG <sub>1</sub> : 7.4±4.3 days after admission<br>EG <sub>2</sub> : 5.5±4.2 days after admission | Walking plus neuromuscular electrical stimulation                                                                                                                                              | Until discharge<br>EG <sub>1</sub> : 35Hz; 5.7±2.2 sessions<br>EG <sub>2</sub> : 50Hz; 8.7±4.6 sessions | 1 session/day; 30 min/session                  | Exercise capacity – ESWT (sec)            | EG <sub>1</sub> : Pre 110.8±64.8 vs Post 219.8±110.7, p=0.035<br>EG <sub>2</sub> : Pre 78.2±56.7 vs Post 223.8±110.7, p=0.001<br>Pre/Post change: EG <sub>1</sub> vs EG <sub>2</sub> , p=0.46<br>ES=-0.4 |
|                                                      |                                                                                                                                                                                                         |                                                                                                               |                                                                                                                                                                                                |                                                                                                         |                                                | Muscle strength – QMVC (kg)               | EG <sub>1</sub> : Pre 24.5±10.0 vs Post 28.4±10.2, p=0.036<br>EG <sub>2</sub> : Pre 22.6±10.7 vs Post 26.0±9.4, p=0.087<br>Pre/Post change: EG <sub>1</sub> vs EG <sub>2</sub> , p=0.85<br>ES=0.0        |
| Lainscak et al., 2013 <sup>57</sup><br>Slovenia      | Patients with AECOPD<br>EG: n=118; 69.0%♂;<br>71.0±9.0yrs; FEV <sub>1</sub> 36.0±15.0%pred<br>CG: n=135; 75.0%♂;<br>71.0±9.0yrs; FEV <sub>1</sub> 36.0±16.0%pred                                        | Within 48h of admission<br>EG: Inpatient and Home<br>CG: Inpatient                                            | EG: usual care plus discharge coordinator assessing patient situation and homecare needs<br>CG: usual care, i.e., routine patient education, supervised inhaler use, respiratory physiotherapy | EG: 7-10 days; 1 home visit plus phone-calls<br>CG: NS                                                  | EG: NS<br>CG: NS                               | HRQoL – SGRQ score                        | Total score<br>Pre/Post change: EG 1.1 [-9.5; 8.4] vs CG -0.1 [-11.3; 8.1], p=0.774<br>Improvement ≥ MCID: EG 24 (38.0%) vs CG 30 (42.0%), p=0.673                                                       |
|                                                      |                                                                                                                                                                                                         |                                                                                                               |                                                                                                                                                                                                |                                                                                                         |                                                | Hospital readmission – No (%) of patients | At 6 months<br>EG 17 (14.0%) vs CG 42 (31.0%), p=0.002<br>HR=0.4, 95%CI (0.2-0.8), p=0.002                                                                                                               |
|                                                      |                                                                                                                                                                                                         |                                                                                                               |                                                                                                                                                                                                |                                                                                                         |                                                | Mortality – No (%) of patients            | At 6 months<br>EG 11 (9.0%) vs CG 13 (10.0%), p=0.934<br>HR=0.5, 95%CI (0.2-1.3), p=0.164                                                                                                                |
| Ali et al., 2014 <sup>24</sup><br>India              | Patients hospitalized with AECOPD<br>EG: n=15; 73.3%♂;                                                                                                                                                  | Within 24h of clinical stabilization<br>Inpatient for 3-4days<br>EG: outpatient from                          | EG: self-management education, aerobic interval training                                                                                                                                       | 3 weeks<br>EG: 75% of maximal workload achieved at CPET; 70-80% of                                      | EG: 3 sessions/week; ≥40 min/session<br>CG: NS | Exercise capacity – 6MWD (m)              | EG: Pre 291.1±124.9 vs Post 363.5±85.6, p=0.0001<br>CG: Pre 325.3±89.2 vs Post 332.1±104.4, p=0.706                                                                                                      |

|                                                                                                                         |                                                                    |                                                             |                                                                                                             |                                                          |                                                                                                                                  |
|-------------------------------------------------------------------------------------------------------------------------|--------------------------------------------------------------------|-------------------------------------------------------------|-------------------------------------------------------------------------------------------------------------|----------------------------------------------------------|----------------------------------------------------------------------------------------------------------------------------------|
| 63.4±7.3yrs; FEV <sub>1</sub><br>46.3±20.8%pred<br>CG: n=15; 86.7%σ;<br>63.8±9.2yrs; FEV <sub>1</sub><br>44.6±17.7%pred | the time of<br>discharge<br>CG: home from the<br>time of discharge | (walking, biking),<br>resistance training<br>CG: usual care | 1RM<br>Progression:<br>Aerobic training – ↓<br>rest periods;<br>Resistance training –<br>↑5% load<br>CG: NS |                                                          | EG vs CG, p=0.013<br>ES=0.6                                                                                                      |
|                                                                                                                         |                                                                    |                                                             |                                                                                                             | Exercise capacity –<br>VO <sub>2</sub> peak (%pred)      | EG: Pre 55.0±22.4 vs Post<br>65.4±22.0, p=0.02<br>CG: Pre 55.7±11.9 vs Post<br>57.1±11.8, p=0.70<br>EG vs CG, p=0.902<br>ES=0.5  |
|                                                                                                                         |                                                                    |                                                             |                                                                                                             | Lung function – FEV <sub>1</sub><br>(L)                  | EG: Pre 1.4±0.6 vs Post 1.5±0.6,<br>p=0.02<br>CG: Pre 1.2±0.5 vs Post 1.2±0.5,<br>p=0.781<br>EG vs CG, p=0.221<br>ES=0.2         |
|                                                                                                                         |                                                                    |                                                             |                                                                                                             | Lung function – FEV <sub>1</sub><br>(%pred)              | EG: Pre 46.3±20.8 vs Post<br>51.5±27.9, p=0.04<br>CG: Pre 44.6±17.7 vs Post<br>40.8±14.8, p=0.10<br>EG vs CG, p=0.014<br>ES=0.4  |
|                                                                                                                         |                                                                    |                                                             |                                                                                                             | Lung function – FVC<br>(L)                               | EG: Pre 2.4±0.6 vs Post 2.5±0.6,<br>p=0.24<br>CG: Pre 2.3±0.6 vs Post 2.3±0.6,<br>p=0.68<br>EG vs CG, p=0.467<br>ES=0.2          |
|                                                                                                                         |                                                                    |                                                             |                                                                                                             | Lung function – FVC<br>(%pred)                           | EG: Pre 74.6±12.7 vs Post<br>78.1±18.9, p=0.36<br>CG: Pre 65.6±16.4 vs Post<br>64.8±16.1, p=0.74<br>EG vs CG, p=0.419<br>ES=0.3  |
|                                                                                                                         |                                                                    |                                                             |                                                                                                             | Lung function –<br>FEV <sub>1</sub> /FVC                 | EG: Pre 53.4±15.5 vs Post<br>57.5±16.7, p=0.04<br>CG: Pre 53.1±12.8 vs Post<br>50.4±13.6, p=0.256<br>EG vs CG, p=0.250<br>ES=0.5 |
|                                                                                                                         |                                                                    |                                                             |                                                                                                             | Vital signs & SpO <sub>2</sub> –<br>SpO <sub>2</sub> (%) | EG: Pre 95.7±2.2 vs Post<br>96.5±2.0, p=0.04<br>CG: Pre 96.7±1.6 vs Post                                                         |

|                                             |                                                                                                                                                                                                                                                                                                                                                                                                                                                                                                                                                                                                                                                                                                                                                    |
|---------------------------------------------|----------------------------------------------------------------------------------------------------------------------------------------------------------------------------------------------------------------------------------------------------------------------------------------------------------------------------------------------------------------------------------------------------------------------------------------------------------------------------------------------------------------------------------------------------------------------------------------------------------------------------------------------------------------------------------------------------------------------------------------------------|
|                                             | 96.1±2.4, p=0.660<br>EG vs CG, p=0.18<br>ES=0.7                                                                                                                                                                                                                                                                                                                                                                                                                                                                                                                                                                                                                                                                                                    |
| Symptoms: Dyspnoea<br>– modified Borg scale | EG: Pre 3.3±1.9 vs Post 2.9±1.7,<br>p=0.39<br>CG: Pre 3.7±1.8 vs Post 2.9±1.6,<br>p=0.119<br>EG vs CG, p=0.55<br>ES=0.2                                                                                                                                                                                                                                                                                                                                                                                                                                                                                                                                                                                                                            |
| HRQoL – SF-36 score                         | Exercise<br>EG: Pre 185.3±82.0 vs Post<br>242.0±65.8, p=0.014<br>CG: Pre 202.0±99.6 vs Post<br>216.0±96.6, p=0.16<br>EG vs CG, p=0.03<br>ES=0.5<br>Physical functioning<br>EG: Pre 19.3±18.6 vs Post<br>82.7±9.7, p=0.0006<br>CG: Pre 18.7±14.1 vs Post<br>51.7±25.2, p=0.001<br>EG vs CG, p=0.005<br>ES=1.5<br>Physical health<br>EG: Pre 0.0±0.0 vs Post<br>74.3±29.3, p=0.0005<br>CG: Pre 5.0±10.4 vs Post<br>30.0±41.4, p=0.048<br>EG vs CG, p=0.005<br>ES=1.9<br>Emotional problem<br>EG: Pre 0.0±0.0 vs Post<br>84.2±21.1, p=0.0005<br>CG: Pre 15.4±21.2 vs Post<br>44.4±43.1, p=0.041<br>EG vs CG, p=0.008<br>ES=2.1<br>Energy/fatigue<br>EG: Pre 38.0±8.0 vs Post<br>65.0±9.3, p=0.0005<br>CG: Pre 45.3±10.3 vs Post<br>53.3±12.9, p=0.076 |

EG vs CG, p=0.001  
 ES=1.8  
 Emotional well-being  
 EG: Pre 41.2±11.1 vs Post 63.3±9.1, p=0.001  
 CG: Pre 51.7±17.1 vs Post 61.3±16.6, p=0.010  
 EG vs CG, p=0.021  
 ES=0.9  
 Social functioning  
 EG: Pre 47.3±15.8 vs Post 75.0±15.7, p=0.002  
 CG: Pre 49.7±16.4 vs Post 61.3±20.2, p=0.077  
 EG vs CG, p=0.049  
 ES=0.9  
 Pain  
 EG: Pre 46.0±14.4 vs Post 84.2±13.2, p=0.0006  
 CG: Pre 53.2±13.2 vs Post 81.4±14.1, p=0.0009  
 EG vs CG, p=0.092  
 ES=0.7  
 General health  
 EG: Pre 40.2±8.9 vs Post 54.0±12.3, p=0.008  
 CG: Pre 42.0±13.7 vs Post 53.5±13.0, p=0.008  
 EG vs CG, p=0.785  
 ES=0.2

|                                                |                                                                                                                                                                        |                                                                                     |                                                                                                                                                                                                          |                                                                                                                                     |                                        |                                                                      |                                                                                                                                                                                                                         |
|------------------------------------------------|------------------------------------------------------------------------------------------------------------------------------------------------------------------------|-------------------------------------------------------------------------------------|----------------------------------------------------------------------------------------------------------------------------------------------------------------------------------------------------------|-------------------------------------------------------------------------------------------------------------------------------------|----------------------------------------|----------------------------------------------------------------------|-------------------------------------------------------------------------------------------------------------------------------------------------------------------------------------------------------------------------|
| Borges et al.,<br>2014 <sup>26</sup><br>Brazil | Patients hospitalized with AECOPD<br>EG: n=15; 53.3%♂; 64.1±12.5yrs; FEV <sub>1</sub> 41.7±13.6%pred<br>CG: n=14; 71.4%♂; 67.8±9.0yrs; FEV <sub>1</sub> 39.1±15.5%pred | Inpatient<br>EG: Exercise from the 3 <sup>rd</sup> day of hospitalization<br>CG: NS | EG: chest physiotherapy, non-invasive ventilation (if needed), verbal instructions, whole-body resistance training<br>CG: chest physiotherapy, non-invasive ventilation (if needed), verbal instructions | EG: ≥3 sessions (mean 5.6 sessions); ≥80% of 1RM; modified Borg scale <7; Progression: ↑weight based on symptoms and Borg<br>CG: NS | EG: 1 session/day<br>CG: 1 session/day | Exercise capacity – 6MWD (m)<br><br>Muscle strength – upper limb (%) | Pre/Post change: EG 160.0±61.0 vs CG 11.0±83.0, p<0.05<br>ES=2.1<br><br>Shoulder abductors<br>Pre/Post change: EG p<0.05<br>CG p>0.05<br>EG vs CG p<0.05<br>Shoulder flexors<br>Pre/Post change: EG p>0.05<br>CG p>0.05 |
|------------------------------------------------|------------------------------------------------------------------------------------------------------------------------------------------------------------------------|-------------------------------------------------------------------------------------|----------------------------------------------------------------------------------------------------------------------------------------------------------------------------------------------------------|-------------------------------------------------------------------------------------------------------------------------------------|----------------------------------------|----------------------------------------------------------------------|-------------------------------------------------------------------------------------------------------------------------------------------------------------------------------------------------------------------------|



|                                             |                                                                                                                                                                                                                                                                                  |
|---------------------------------------------|----------------------------------------------------------------------------------------------------------------------------------------------------------------------------------------------------------------------------------------------------------------------------------|
|                                             | EG vs CG p>0.05<br>Elbow flexors<br>Pre/Post change:<br>EG p<0.05<br>CG p>0.05<br>EG vs CG p<0.05                                                                                                                                                                                |
| Muscle strength –<br>lower limb (%)         | Hip flexors<br>Pre/Post change:<br>EG 17.1±5.4, p<0.05<br>CG <0.0, p<0.05<br>EG vs CG p<0.05<br>Knee extensors<br>Pre/Post change:<br>EG p>0.05<br>CG <0.0, p<0.05<br>EG vs CG p>0.05<br>Knee flexors<br>Pre/Post change:<br>EG 16.2±4.7, p<0.05<br>CG p>0.05<br>EG vs CG p<0.05 |
| Lung function – FEV <sub>1</sub><br>(%pred) | EG: Pre 41.7±13.6 vs Post<br>44.6±14.1, p>0.05<br>CG: Pre 39.1±15.5 vs Post<br>42.3±14.4, p>0.05<br>EG vs CG, p>0.05<br>ES=0.0                                                                                                                                                   |
| Physical activity levels<br>– % of patients | Inactive<br>EG 87.0% vs CG 70.0%, p>0.05<br>OR=2.6                                                                                                                                                                                                                               |
| HRQoL – SGRQ score                          | Symptoms score<br>Pre/Post change: EG 1.1±15.7<br>vs CG -4.8±5.9, p>0.05<br>ES=0.5<br>Activity score<br>Pre/Post change: EG -14.3±13.7<br>vs CG -10.1±19.4, p>0.05<br>ES=-0.3<br>Impact score<br>Pre/post change: -13.3±18.9 vs<br>CG -3.1±37.4<br>ES=-0.3                       |

|                                               |                                                                                                                                                                                                          |                                                        |                                                                                                                                                                                                                                                                         |                        |                                             |                                                                                                 |                                                                                                                                                                                                                                                                                                                                                                                                                                                                                                                                                                                                                                                                                                                                                   | Total score<br>Pre/Post change: -10.7±11.8 vs<br>CG -2.4±19.6, p>0.05<br>ES=-0.5<br>EG 8.0±2.2 vs CG 9.6±3.2,<br>p>0.05<br>ES=-0.6 |
|-----------------------------------------------|----------------------------------------------------------------------------------------------------------------------------------------------------------------------------------------------------------|--------------------------------------------------------|-------------------------------------------------------------------------------------------------------------------------------------------------------------------------------------------------------------------------------------------------------------------------|------------------------|---------------------------------------------|-------------------------------------------------------------------------------------------------|---------------------------------------------------------------------------------------------------------------------------------------------------------------------------------------------------------------------------------------------------------------------------------------------------------------------------------------------------------------------------------------------------------------------------------------------------------------------------------------------------------------------------------------------------------------------------------------------------------------------------------------------------------------------------------------------------------------------------------------------------|------------------------------------------------------------------------------------------------------------------------------------|
| Deepak et al.,<br>2014 <sup>28</sup><br>India | Patients discharge<br>from the hospital<br>due to AECOPD<br>EG: n=30; 93.3%♂;<br>58.4±6.8yrs; FEV <sub>1</sub><br>53.3±18.4%pred<br>CG: n=30; 93.3%♂;<br>59.4±6.7yrs; FEV <sub>1</sub><br>46.7±14.8%pred | Within 2 weeks of<br>hospital discharge;<br>Outpatient | EG: conventional<br>treatment plus PR<br>program – aerobic<br>training, resistance<br>training, education,<br>chest physiotherapy,<br>breathing retraining<br>techniques, psycho-<br>social rehabilitation,<br>nutrition<br>CG: conventional<br>treatment without<br>PR | EG: 12 weeks<br>CG: NS | EG: Exercise<br>sessions up to 2h<br>CG: NS | Exercise capacity –<br>6MWD (m)<br><br>Symptoms: Dyspnoea<br>– mMRC score<br>HRQoL – SGRQ score | EG: Pre 303.1±84.5 vs Post<br>340.5±86.2, p<0.001<br>improvement >MCID: 32.1%<br>CG: Pre 288.3±96.1 vs<br>260.0±100.2, p<0.001<br>improvement >MCID: 0.0%<br>EG vs CG, p<0.05<br>ES=0.7<br>EG: Pre vs Post, p=0.013<br>CG: Pre vs Post, p=0.102<br>Symptoms score<br>EG: Pre 62.0±14.0 vs Post<br>51.5±15.3<br>CG: Pre 56.7±16.8 vs Post<br>59.2±16.3<br>ES=-0.8<br>Activity score<br>EG: Pre 72.8±16.6 vs Post<br>56.2±15.8<br>CG: Pre 69.2±20.8 vs Post<br>74.5±23.7<br>ES=-1.1<br>Impact score<br>EG: Pre 40.3±14.3 vs Post<br>25.4±13.7<br>CG: Pre 50.6±21.8 vs Post<br>57.0±21.2<br>ES=-1.2<br>Total score<br>EG: Pre 53.7±12.9 vs Post<br>39.0±12.9, p<0.001<br>improvement >MCID: 82.1%<br>CG: Pre 57.3±18.5 vs Post<br>62.6±18.7, p=0.002 |                                                                                                                                    |

|                                                   |                                                                                                                                                                                       |                                                         |                                                                                                                                                                                          |                                          |                                        |                                              | improvement >MCID: 3.6%<br>EG vs CG, p<0.05<br>ES=-1.2                                                                                                                     |
|---------------------------------------------------|---------------------------------------------------------------------------------------------------------------------------------------------------------------------------------------|---------------------------------------------------------|------------------------------------------------------------------------------------------------------------------------------------------------------------------------------------------|------------------------------------------|----------------------------------------|----------------------------------------------|----------------------------------------------------------------------------------------------------------------------------------------------------------------------------|
| Greulich et al.,<br>2014 <sup>30</sup><br>Germany | Patients hospitalized<br>with AECOPD<br>EG: n=20; 70.0%♂;<br>66.4±9.9yrs; FEV <sub>1</sub><br>32.7±13.2%pred<br>CG: n=20; 60.0%♂;<br>70.4±10.1yrs; FEV <sub>1</sub><br>38.4±17.8%pred | Within the first 24h<br>of hospitalization<br>Inpatient | EG: standard<br>physical therapy<br>plus whole body<br>vibration<br>CG: standard<br>physical therapy<br>program, i.e.,<br>mobilization, passive<br>movement and<br>respiratory exercises | Until discharge<br>EG: 12-26Hz<br>CG: NS | EG: 26min/session<br>CG: 20min/session | Exercise capacity –<br>6MWD (m)              | EG: Pre 167.9±117.5 vs Post<br>263.5±124.1, p<0.001<br>CG: Pre 203.8±126.1 vs Post<br>198.7±101.4, p>0.05<br>Difference: EG 95.6±76.3 vs CG<br>6.1±81.7, p=0.007<br>ES=0.8 |
|                                                   |                                                                                                                                                                                       |                                                         |                                                                                                                                                                                          |                                          |                                        | Exercise capacity –<br>Chair rising test (s) | EG: Pre 19.2±7.4 vs Post<br>17.0±7.0, p=0.02<br>CG: Pre 18.5±7.3 vs Post<br>28.5±32.1, p=0.14<br>Difference: EG -2.2±8.3 vs CG<br>4.0±9.2, p=0.003<br>ES=-0.7              |
|                                                   |                                                                                                                                                                                       |                                                         |                                                                                                                                                                                          |                                          |                                        | Lung function – FEV <sub>1</sub><br>(%pred)  | EG: Pre 32.7±13.2 vs Post<br>36.7±13.9, p=0.04<br>CG: Pre 37.9±17.4 vs Post<br>43.2±22.8, p=0.03<br>EG vs CG, p>0.05<br>ES=-0.1                                            |
|                                                   |                                                                                                                                                                                       |                                                         |                                                                                                                                                                                          |                                          |                                        | Impact of disease –<br>CAT score             | EG: Pre 29.1±6.5 vs Post<br>25.1±5.7, p=0.02<br>CG: Pre 24.3±9.1 vs Post<br>22.7±7.2, p>0.05<br>Pre/Post change: EG vs CG,<br>p=0.1<br>ES=-0.3                             |
|                                                   |                                                                                                                                                                                       |                                                         |                                                                                                                                                                                          |                                          |                                        | HRQoL – SGRQ score                           | Total score<br>EG: Pre 74.2±13.8 vs Post<br>67.8±18.5, p>0.05<br>CG: Pre 67.6±15.2 vs Post<br>69.7±18.0, p>0.05<br>Pre/Post change: EG vs CG,<br>p=0.049<br>ES=-0.5        |
|                                                   |                                                                                                                                                                                       |                                                         |                                                                                                                                                                                          |                                          |                                        | Length of<br>hospitalization – No<br>of days | EG 8.6±3.8 vs CG 8.6±6.2,<br>p=0.58                                                                                                                                        |

ES=0.0

|                                                    |                                                                                                                                                                                       |                                         |                                                                                                                                                                                                                                                                                          |                                                                                   |                                                                                                                                                                                                   |                                                         |                                                                                                                                                                                                                                                                                   |
|----------------------------------------------------|---------------------------------------------------------------------------------------------------------------------------------------------------------------------------------------|-----------------------------------------|------------------------------------------------------------------------------------------------------------------------------------------------------------------------------------------------------------------------------------------------------------------------------------------|-----------------------------------------------------------------------------------|---------------------------------------------------------------------------------------------------------------------------------------------------------------------------------------------------|---------------------------------------------------------|-----------------------------------------------------------------------------------------------------------------------------------------------------------------------------------------------------------------------------------------------------------------------------------|
| Osadnik et al.,<br>2014 <sup>22</sup><br>Australia | Patients hospitalized<br>with AECOPD<br>EG: n=45; 62.2%♂;<br>69.5±9.8yrs; FEV <sub>1</sub><br>37.3±19.7%pred<br>CG: n=45; 66.7%♂;<br>67.8±11.6yrs; FEV <sub>1</sub><br>44.4±20.2%pred | Within 48h of<br>admission<br>Inpatient | EG: usual care plus<br>PEP therapy – active<br>expiration via mask,<br>huff and cough<br>CG: usual care, i.e.,<br>bronchodilators,<br>corticosteroids,<br>antibiotics, oxygen,<br>NIV and standard<br>physical therapy<br>(walking or<br>equivalent lower<br>limb exercise and<br>cough) | Until discharge or<br>24h without sputum<br>EG: 10-20cmH <sub>2</sub> O<br>CG: NS | Daily sessions<br>Up to 30min of<br>walking or<br>equivalent lower<br>limb exercise<br>EG: 1 supervised<br>session/day plus 2<br>unsupervised<br>sessions/day;<br>20min/session of<br>PEP therapy | Exercise capacity –<br>6MWD (m)                         | Discharge vs 8-week follow-up<br>EG: 271.0±22.7 vs 324.0±24.2<br>CG: 297.0±23.2 vs 296.0±25.1<br>EG vs CG, p=0.052<br>ES=2.3                                                                                                                                                      |
|                                                    |                                                                                                                                                                                       |                                         |                                                                                                                                                                                                                                                                                          |                                                                                   |                                                                                                                                                                                                   | Lung function – FEV <sub>1</sub><br>(%pred)             | EG: Pre 37.3±19.7 vs Post<br>35.6±1.4<br>CG: Pre 44.4±20.2 vs Post<br>35.9±1.4<br>EG vs CG, p>0.05<br>ES=0.5                                                                                                                                                                      |
|                                                    |                                                                                                                                                                                       |                                         |                                                                                                                                                                                                                                                                                          |                                                                                   |                                                                                                                                                                                                   | Symptoms: Dyspnoea<br>– mMRC score                      | Discharge vs 8-week follow-up<br>EG: 2.8±0.2 vs 2.2±0.2<br>CG: 2.4±0.2 vs 2.6±0.2<br>EG vs CG, p=0.006<br>ES=-4.0                                                                                                                                                                 |
|                                                    |                                                                                                                                                                                       |                                         |                                                                                                                                                                                                                                                                                          |                                                                                   |                                                                                                                                                                                                   | Symptoms –<br>Breathlessness, cough<br>and sputum scale | EG: Pre 7.5±2.0 vs Post 5.2±0.4<br>CG: Pre 7.5±2.2 vs Post 5.0±0.4<br>EG vs CG, p>0.05<br>ES=0.1                                                                                                                                                                                  |
|                                                    |                                                                                                                                                                                       |                                         |                                                                                                                                                                                                                                                                                          |                                                                                   |                                                                                                                                                                                                   | Disease severity –<br>BODE index                        | Discharge vs 8-week follow-up<br>EG: 5.8±0.4 vs 5.2±0.5<br>CG: 5.3±0.5 vs 5.1±0.5<br>EG vs CG, p>0.05<br>ES=-0.8                                                                                                                                                                  |
|                                                    |                                                                                                                                                                                       |                                         |                                                                                                                                                                                                                                                                                          |                                                                                   |                                                                                                                                                                                                   | HRQoL – SGRQ score                                      | Symptoms score<br>EG: Pre 66.0±17.9 vs Post<br>55.8±3.4<br>CG: Pre 68.5±19.0 vs Post<br>52.8±3.6<br>EG vs CG, p>0.05<br>ES=0.4<br>Activity score<br>EG: Pre 56.3±27.0 vs Post<br>46.9±3.6<br>CG: Pre 53.0±26.9 vs Post<br>48.9±3.8<br>EG vs CG, p>0.05<br>ES=-0.3<br>Impact score |

|                                          |                                                                                                                                                                    |                                                            |                                                                                                        |                                                                    |                                                                                       |                                                   |                                                                                                                                                                                                                                 |
|------------------------------------------|--------------------------------------------------------------------------------------------------------------------------------------------------------------------|------------------------------------------------------------|--------------------------------------------------------------------------------------------------------|--------------------------------------------------------------------|---------------------------------------------------------------------------------------|---------------------------------------------------|---------------------------------------------------------------------------------------------------------------------------------------------------------------------------------------------------------------------------------|
|                                          |                                                                                                                                                                    |                                                            |                                                                                                        |                                                                    |                                                                                       |                                                   | EG: Pre 41.4±18.3 vs Post 34.2±2.6<br>CG: Pre 40.8±20.4 vs Post 32.9±2.8<br>EG vs CG, p>0.05<br>ES=0.1<br>Total score<br>EG: Pre 49.9±18.3 vs Post 41.6±2.6<br>CG: Pre 49.0±19.5 vs Post 40.8±2.8<br>EG vs CG, p>0.05<br>ES=0.0 |
|                                          |                                                                                                                                                                    |                                                            |                                                                                                        |                                                                    |                                                                                       | Length of hospitalization – No of days            | EG 4.9 [3.0; 7.3] vs CG 4.3 [2.9; 7.6], p=0.591                                                                                                                                                                                 |
|                                          |                                                                                                                                                                    |                                                            |                                                                                                        |                                                                    |                                                                                       | Hospital readmission – No of readmissions         | At 6 months<br>EG 1.0 [0.0; 1.8] vs CG 0.0 [0.0; 1.0], p=0.359                                                                                                                                                                  |
|                                          |                                                                                                                                                                    |                                                            |                                                                                                        |                                                                    |                                                                                       | Mortality – No (%) of patients                    | At 6 months<br>EG 4 (9.0%) vs CG 6 (14.0%), p=0.484<br>OR=0.6                                                                                                                                                                   |
| Song et al., 2014 <sup>39</sup><br>Korea | Patients admitted with AECOPD<br>EG: n=20; 55.0%♂; 66.6±11.1yrs; FEV <sub>1</sub> 57.1±10.0%pred<br>CG: n=20; 75.0%♂; 68.1±6.5yrs; FEV <sub>1</sub> 60.4±20.9%pred | The day before discharge<br>Inpatient, Outpatient and Home | EG: education, breathing exercise, stretch, walk, self-care support<br>CG: usual care, i.e., education | EG: 2 months; 3 face-to-face sessions plus 2 phone-calls<br>CG: NS | EG: face-to-face sessions – 135min/session;<br>Phone calls – 15-30 min/call<br>CG: NS | Exercise capacity – 6MWD (m)                      | EG: Pre 300.3±86.6 vs Post 333.5±79.2<br>CG: Pre 290.0±52.5 vs Post 312.7±72.1<br>EG vs CG p=0.423<br>ES=0.1                                                                                                                    |
|                                          |                                                                                                                                                                    |                                                            |                                                                                                        |                                                                    |                                                                                       | Lung function – PEF (L/h)                         | EG: Pre 127.5±38.9 vs Post 132.7±7.1<br>CG: Pre 130.1±21.1 vs Post 134.3±15.7<br>EG vs CG, p=0.686<br>ES=0.0                                                                                                                    |
|                                          |                                                                                                                                                                    |                                                            |                                                                                                        |                                                                    |                                                                                       | Vital signs & SpO <sub>2</sub> – Heart rate (bpm) | After 6MWT<br>EG: Pre 97.9±0.7 vs Post 100.0±15.6<br>CG: Pre 86.7±6.8 vs Post 88.3±13.5<br>EG vs CG, p=0.887                                                                                                                    |

ES=0.0

Vital signs & SpO<sub>2</sub> – SpO<sub>2</sub> (%)

After the 6MWT  
EG: Pre 87.3±7.6 vs Post 85.3±14.3  
CG: Pre 91.6±8.2 vs Post 89.8±7.7  
EG vs CG, p=0.785  
ES=0.0

HRQoL – SGRQ score

Symptoms score  
EG: Pre 47.2±20.5 vs Post 35.8±10.2  
CG: Pre 57.5±21.5 vs Post 67.5±15.9  
EG vs CG, p=0.003  
ES=-1.2

Activity score  
EG: Pre 69.0±19.6 vs Post 61.3±28.6  
CG: Pre 75.9±8.2 vs Post 74.6±8.2  
EG vs CG, p=0.024  
ES=-0.3

Impact score  
EG: Pre 57.1±19.1 vs Post 43.4±9.4  
CG: Pre 65.1±21.0 vs Post 67.9±8.6  
EG vs CG, p=0.034  
ES=-1.1

Total score  
EG: Pre 52.9±18.2 vs Post 42.3±7.9  
CG: Pre 62.1±17.4 vs Post 66.8±6.4  
EG vs CG p=0.033  
ES=-1.1

---

|                                                |                                                                                      |                              |                                                                                                    |                       |                                                |                                    |                                                                                                                |
|------------------------------------------------|--------------------------------------------------------------------------------------|------------------------------|----------------------------------------------------------------------------------------------------|-----------------------|------------------------------------------------|------------------------------------|----------------------------------------------------------------------------------------------------------------|
| Valenza et al.,<br>2014 <sup>55</sup><br>Spain | Patients hospitalized<br>with AECOPD<br>EG: n=23; 100.0% $\sigma^*$ ;<br>76.0±5.5yrs | Since admission<br>Inpatient | EG: control<br>breathing program –<br>relaxation exercises,<br>pursed-lips<br>breathing and active | EG: 10 days<br>CG: NS | EG: 2 sessions/day;<br>30min/session<br>CG: NA | Symptoms: Dyspnoea<br>– mMRC score | EG: Pre 2.8±1.2 vs Post 0.6±0.9,<br>p=0.004<br>CG: Pre 2.7±0.4 vs Post 3.6±5.7,<br>p>0.05<br>EG vs CG, p<0.001 |
|------------------------------------------------|--------------------------------------------------------------------------------------|------------------------------|----------------------------------------------------------------------------------------------------|-----------------------|------------------------------------------------|------------------------------------|----------------------------------------------------------------------------------------------------------------|

CG: n=23; 100.0%♂;  
74.4±6.7yrs

expiration  
CG: usual care, i.e.,  
standard medical  
treatment

|                                   |                                                                                                                                                                                                                                                                                                                                                                                                                                                                                                                                                                                        |
|-----------------------------------|----------------------------------------------------------------------------------------------------------------------------------------------------------------------------------------------------------------------------------------------------------------------------------------------------------------------------------------------------------------------------------------------------------------------------------------------------------------------------------------------------------------------------------------------------------------------------------------|
| Symptoms: Anxiety – HADS score    | ES=-1.0<br>EG: Pre 13.8±4.0 vs Post 2.1±6.8, p<0.05<br>CG: Pre 14.0±4.9 vs Post 8.1±8.3, p<0.05<br>EG vs CG, p<0.001<br>ES=-0.9                                                                                                                                                                                                                                                                                                                                                                                                                                                        |
| Symptoms: Depression – HADS score | EG: Pre 9.6±2.1 vs Post 3.6±5.7, p<0.05<br>CG: Pre 8.9±4.0 vs Post 7.0±3.1, p>0.05<br>EG vs CG, p<0.001<br>ES=-1.0                                                                                                                                                                                                                                                                                                                                                                                                                                                                     |
| HRQoL – EuroQol                   | Mobility score<br>EG: Pre 2.1±0.9 vs Post 0.7±0.7, p<0.05<br>CG: Pre 2.0±0.6 vs Post 1.8±1.0, p>0.05<br>EG vs CG, p<0.001<br>ES=-1.5<br>Self-care score<br>EG: Pre 1.9±1.0 vs Post 0.3±0.5, p<0.05<br>CG: Pre 2.2±0.8 vs Post 2.0±0.7, p>0.05<br>EG vs CG, p<0.001<br>ES=-1.8<br>Activity score<br>EG: Pre 2.3±0.8 vs Post 0.1±0.7, p<0.05<br>CG: Pre 2.5±0.5 vs Post 2.3±0.6, p<0.005<br>EG vs CG, p<0.005<br>ES=-3.0<br>Pain score<br>EG: Pre 2.0±0.5 vs Post 0.4±0.7, p<0.05<br>CG: Pre 2.1±0.9 vs Post 2.0±0.4, p>0.05<br>EG vs CG, p<0.001<br>ES=-2.3<br>Anxiety/depression score |

|                                        |                                                                                                                                                                 |                                               |                                                                                                                                                                                       |                                                                                                                                                                                                |                                             |                                                                                                                                                                                                                   |                                                                                                                                                                                                                                                                                                                                                                                                                                                                                                                                                                                                                                                                                                                                                 |
|----------------------------------------|-----------------------------------------------------------------------------------------------------------------------------------------------------------------|-----------------------------------------------|---------------------------------------------------------------------------------------------------------------------------------------------------------------------------------------|------------------------------------------------------------------------------------------------------------------------------------------------------------------------------------------------|---------------------------------------------|-------------------------------------------------------------------------------------------------------------------------------------------------------------------------------------------------------------------|-------------------------------------------------------------------------------------------------------------------------------------------------------------------------------------------------------------------------------------------------------------------------------------------------------------------------------------------------------------------------------------------------------------------------------------------------------------------------------------------------------------------------------------------------------------------------------------------------------------------------------------------------------------------------------------------------------------------------------------------------|
|                                        |                                                                                                                                                                 |                                               |                                                                                                                                                                                       |                                                                                                                                                                                                |                                             |                                                                                                                                                                                                                   | EG: Pre 2.4±0.7 vs Post 1.3±1.4, p<0.05<br>CG: Pre 2.5±0.8 vs Post 2.3±0.9, p>0.05<br>EG vs CG, p<0.001<br>ES=-0.9                                                                                                                                                                                                                                                                                                                                                                                                                                                                                                                                                                                                                              |
| He et al., 2015 <sup>31</sup><br>China | Patients admitted with AECOPD<br>EG: n=66; 90.9%♂; 69.2±1.5yrs; FEV <sub>1</sub> 38.0±3.0%pred<br>CG: n=28; 82.1%♂; 73.9±1.8yrs; FEV <sub>1</sub> 39.0±5.1%pred | From the second day of admission<br>Inpatient | EG: PR program – exercise training (stretches, endurance and strength training), relaxation, breathing retraining (breathing control and pursed lips) and education<br>CG: usual care | Until discharge<br>EG: dyspnoea between 3-5 on modified Borg scale;<br>Treadmill – 60% of peak work rate in 6MWT;<br>Progression: ↑walk time; ↑number of sets at resistance training<br>CG: NS | EG: 2 sessions/day; 30min/session<br>CG: NS | Exercise capacity – 6MWD (m)<br><br>Functionality – Activity of Daily Living<br>Dyspnoea scale score<br><br>Vital signs & SpO <sub>2</sub> – SpO <sub>2</sub> (%)<br><br>Symptoms: Dyspnoea – modified Borg scale | EG: Pre 242.0±15.0 vs Post 291.0±14.6, p<0.001<br>CG: Pre 263.9±20.8 vs Post 273.7±20.0, p=0.620<br>ES=2.3<br><br>EG: Pre 40.4±2.2 vs Post 60.7±2.3, p<0.001<br>CG: 53.3±2.2 vs Post 58.1±2.4, p=0.339<br>ES=6.8<br><br>At rest<br>EG: Pre 95.8±0.7 vs Post 97.1±0.2, p=0.001<br>CG: Pre 96.7±0.5 vs Post 96.3±0.4, p=0.183<br>ES=3.4<br>During exercise<br>EG: Pre 90.7±1.6 vs Post 91.5±1.2, p=0.329<br>CG: Pre 90.9±1.5 vs Post 92.3±1.1, p=0.500<br>ES=-0.4<br><br>At rest<br>EG: Pre 0.4±0.1 vs Post 0.1±0.1, p=0.013<br>CG: Pre 0.5±0.2 vs Post 0.3±0.2, p=0.033<br>ES=-0.7<br>During exercise<br>EG: Pre 3.5±2.5 vs Post 1.8±0.3, p=0.008<br>CG: Pre 3.1±0.4 vs Post 2.2±0.4, p=0.108<br>ES=-0.5<br><br>EG: Pre 3.1±0.9 vs Post 2.2±0.1, |
|                                        |                                                                                                                                                                 |                                               |                                                                                                                                                                                       |                                                                                                                                                                                                |                                             | Symptoms: Dyspnoea                                                                                                                                                                                                | EG: Pre 3.1±0.9 vs Post 2.2±0.1,                                                                                                                                                                                                                                                                                                                                                                                                                                                                                                                                                                                                                                                                                                                |



|                                              |                                                                                                                                                                                       |           |                                                                                                                                                                                                                                                                                                                                                 |                      |                                             |  |                                                              |                                                                                                                                   |
|----------------------------------------------|---------------------------------------------------------------------------------------------------------------------------------------------------------------------------------------|-----------|-------------------------------------------------------------------------------------------------------------------------------------------------------------------------------------------------------------------------------------------------------------------------------------------------------------------------------------------------|----------------------|---------------------------------------------|--|--------------------------------------------------------------|-----------------------------------------------------------------------------------------------------------------------------------|
|                                              |                                                                                                                                                                                       |           |                                                                                                                                                                                                                                                                                                                                                 |                      |                                             |  | – mMRC score                                                 | p<0.001<br>CG: Pre 2.9±0.7 vs Post 2.7±0.7,<br>p=0.165<br>ES=-1.1                                                                 |
|                                              |                                                                                                                                                                                       |           |                                                                                                                                                                                                                                                                                                                                                 |                      |                                             |  | Impact of disease –<br>CAT score                             | EG: Pre 24.3±1.1 vs Post<br>13.1±1.1, p<0.001<br>CG: Pre 22.6±1.4 vs Post<br>17.8±1.6, p<0.001<br>ES=-5.1                         |
|                                              |                                                                                                                                                                                       |           |                                                                                                                                                                                                                                                                                                                                                 |                      |                                             |  | Disease severity –<br>BODE index                             | EG: Pre 5.6±0.2 vs Post 3.8±0.2,<br>p<0.001<br>CG: Pre 5.6±0.3 vs Post 4.9±0.3,<br>p=0.310<br>ES=-4.7                             |
|                                              |                                                                                                                                                                                       |           |                                                                                                                                                                                                                                                                                                                                                 |                      |                                             |  | HRQoL – CRQ score                                            | EG: Pre 98.9±3.5 vs Post<br>123.4±2.1, p<0.001<br>CG: Pre 116.2±2.9 vs Post<br>123.6±2.6, p=0.702<br>ES=6.1                       |
| Liao et al.,<br>2015 <sup>34</sup><br>Taiwan | Patients with<br>AECOPD<br>EG: n=30; 53.3%♂;<br>68.0 [44.0; 89.0]yrs;<br>PEF 140.0 [50.0;<br>240.0]L/s<br>CG: n=31; 67.7%♂;<br>70.0 [52.0; 91.0]yrs;<br>PEF 140.0 [60.0;<br>300.0]L/s | Inpatient | EG: usual care,<br>health education,<br>respiratory<br>rehabilitation<br>exercise training –<br>disease awareness,<br>sputum clearance<br>(postural drainage<br>and vibrating<br>sputum clearance<br>devices), pursed lips<br>breathing, upper<br>limb exercise with<br>deep breathing and<br>walking<br>CG: usual care and<br>health education | EG: 4 days<br>CG: NS | EG: 2 sessions/day;<br>1h/session<br>CG: NS |  | Exercise capacity –<br>6MWD (m)                              | EG: Pre 214.9±86.1 vs Post<br>259.8±74.9, p<0.001<br>CG: 191.4±73.5 vs Post<br>187.9±72.0, p=0.839<br>EG vs CG, p<0.001<br>ES=0.6 |
|                                              |                                                                                                                                                                                       |           |                                                                                                                                                                                                                                                                                                                                                 |                      |                                             |  | Symptoms: Dyspnoea<br>– modified Borg scale                  | EG: Pre 4.5±2.5 vs Post 1.1±1.2,<br>p<0.001<br>CG: Pre 4.1±3.3 vs Post 3.7±3.3,<br>p=0.087<br>EG vs CG, p<0.001<br>ES=-1.1        |
|                                              |                                                                                                                                                                                       |           |                                                                                                                                                                                                                                                                                                                                                 |                      |                                             |  | Symptoms: Cough –<br>Visual Analog Scale                     | EG: Pre 5.3±2.6 vs Post 2.1±1.1,<br>p<0.001<br>CG: Pre 5.3±3.4 vs Post 4.7±3.2,<br>p=0.116<br>EG vs CG, p<0.001<br>ES=-1.0        |
|                                              |                                                                                                                                                                                       |           |                                                                                                                                                                                                                                                                                                                                                 |                      |                                             |  | Symptoms: Sputum –<br>Difficulty to<br>expectorate in No (%) | Easy<br>EG: Pre 22 (73.3%) vs Post 27.0<br>(90.0%)                                                                                |

|                                                              |                                                                                                                                                                     |                                                                                    |                                                                                                                                                                        |                                                       |                |                                      |                                                                                                                                                                                                                                                                        |
|--------------------------------------------------------------|---------------------------------------------------------------------------------------------------------------------------------------------------------------------|------------------------------------------------------------------------------------|------------------------------------------------------------------------------------------------------------------------------------------------------------------------|-------------------------------------------------------|----------------|--------------------------------------|------------------------------------------------------------------------------------------------------------------------------------------------------------------------------------------------------------------------------------------------------------------------|
|                                                              |                                                                                                                                                                     |                                                                                    |                                                                                                                                                                        |                                                       |                | of patients                          | CG: Pre 18 (58.9%) vs Post 21.0 (67.7%)<br>Difficult<br>EG: Pre 8 (26.7%) vs Post 3 (10.0%)<br>CG: Pre 13 (41.9%) vs Post 10 (32.3%)<br>EG vs CG, p=0.034<br>Fisher's = 4.43                                                                                           |
| Benzo et al., 2016 <sup>18</sup><br>United States of America | Patients admitted with AECOPD<br>EG: n=108; 42.6%♂; 67.9±9.8yrs; FEV <sub>1</sub> 40.5±17.1%pred<br>CG: n=107; 47.7%♂; 68.1±9.2yrs; FEV <sub>1</sub> 40.3±17.2%pred | At discharge<br>EG: 1 session inpatient; home from the time of discharge<br>CG: NS | EG: health coaching intervention – written action plan, self-management concept, aerobic training, upper extremities exercises, pursed lip breathing<br>CG: usual care | EG: at least 2 sessions plus phone calls<br>CG: NS    | NS             | HRQoL – CRQ score                    | Emotional score<br>Change at 6 months: EG 0.5±1.0 vs CG 0.1±1.0, p=0.004<br>ES=0.4<br>Improvement >MCID: EG 29.9% vs CG 14.1%, p=0.018<br>Physical score<br>Change at 6 months: EG 0.3±0.9 vs CG 0.0±1.0<br>ES=0.4<br>Improvement >MCID: EG 26.0% vs CG 12.8%, p=0.038 |
|                                                              |                                                                                                                                                                     |                                                                                    |                                                                                                                                                                        |                                                       |                | Hospital readmission – % of patients | At 1 month<br>OR=0.1, 95%CI (0.0-0.8), p=0.028<br>At 3 months<br>OR=0.4, 95%CI (0.2-0.9), p=0.032<br>At 6 months:<br>OR=0.4, 95%CI (0.2-0.9), p=0.034<br>At 12 months:<br>OR=0.6, 95%CI (0.3-1.2), p=0.150                                                             |
|                                                              |                                                                                                                                                                     |                                                                                    |                                                                                                                                                                        |                                                       |                | Mortality – No (%) of patients       | At 12 months<br>EG 10 (9.3%) vs CG 12 (11.3%), p=0.620<br>OR=0.8                                                                                                                                                                                                       |
| Eastwood et al., 2016 <sup>49</sup><br>New Zealand           | Patients admitted with AECOPD with sputum production<br>EG <sub>1</sub> : n=4;                                                                                      | Within 24h of admission<br>Inpatient                                               | EG <sub>1</sub> : active cycle of breathing technique, written instruction and education                                                                               | 1 day supervised session plus 2 unsupervised sessions | 3 sets/session | Lung function – FEV <sub>1</sub> (L) | EG <sub>1</sub> : Pre 1.1±0.2<br>Post day 1 1.2±0.3<br>Post day 2 1.0±0.1<br>EG <sub>2</sub> : Pre 0.8±0.3                                                                                                                                                             |

73.0±9.0yrs; FEV<sub>1</sub>  
 39.0±7.3%pred  
 EG<sub>2</sub>: n=4;  
 74.0±16.0yrs; FEV<sub>1</sub>  
 34.0±13.9%pred  
 EG<sub>3</sub>: n=3;  
 78.0±11.0yrs; FEV<sub>1</sub>  
 34.0±11.8%pred

EG<sub>2</sub>: bubble-PEP,  
 written instruction  
 and education  
 EG<sub>3</sub>: theraPEP,  
 written instruction  
 and education

EG<sub>2</sub>: 10cmH<sub>2</sub>O

Lung function – FVC  
 (L)

Lung function –  
 FEV<sub>1</sub>/FVC

Symptoms –  
 Breathlessness, cough  
 and sputum scale

Post day 1 0.8±0.2  
 Post day 2 0.8±0.3  
 EG<sub>3</sub>: Pre 1.0±0.6  
 Post day 1 1.0±0.5  
 Post day 2 1.2±0.7  
 EG<sub>1</sub> vs EG<sub>2</sub> vs EG<sub>3</sub>, p>0.05  
 EG<sub>1</sub> vs EG<sub>2</sub>: ES=-0.4  
 EG<sub>1</sub> vs EG<sub>3</sub>: ES=-0.6  
 EG<sub>2</sub> vs EG<sub>3</sub>: ES=-0.4  
 EG<sub>1</sub>: Pre 2.5±0.9  
 Post day 1 2.2±0.9  
 Post day 2 2.0±0.5  
 EG<sub>2</sub>: Pre 1.6±0.2  
 Post day 1 1.7±0.3  
 Post day 2 1.4±0.6  
 EG<sub>3</sub>: Pre 2.1±1.0  
 Post day 1 1.9±0.9  
 Post day 2 2.3±1.1  
 EG<sub>1</sub> vs EG<sub>2</sub> vs EG<sub>3</sub>, p>0.05  
 EG<sub>1</sub> vs EG<sub>2</sub>: ES=-0.5  
 EG<sub>1</sub> vs EG<sub>3</sub>: ES=-0.7  
 EG<sub>2</sub> vs EG<sub>3</sub>: ES=-0.5  
 EG<sub>1</sub>: Pre 55.5±8.1  
 Post day 1 58.3±17.1  
 Post day 2 51.5±11.1  
 EG<sub>2</sub>: Pre 47.3±17.9  
 Post day 1 48.0±20.8  
 Post day 2 48.5±14.9  
 EG<sub>3</sub>: Pre 46.5±13.2  
 Post day 1 55.0±16.1  
 Post day 2 51.0±14.2  
 EG<sub>1</sub> vs EG<sub>2</sub> vs EG<sub>3</sub>, p>0.05  
 EG<sub>1</sub> vs EG<sub>2</sub>: ES=-0.4  
 EG<sub>1</sub> vs EG<sub>3</sub>: ES=-0.7  
 EG<sub>2</sub> vs EG<sub>3</sub>: ES=-0.2  
 EG<sub>1</sub>: Post session 1 4.3±1.0  
 Post session 2 4.8±2.9  
 Post session 3 5.3±1.2  
 Post day 2 6.8±1.5  
 EG<sub>2</sub>: Post session 1 6.5±3.5  
 Post session 2 6.5±3.5  
 Post session 3 5.0

|                                                                  |                                                                |
|------------------------------------------------------------------|----------------------------------------------------------------|
|                                                                  | Post day 2 5.0±1.4                                             |
|                                                                  | EG <sub>3</sub> : Post session 1 7.0±4.8                       |
|                                                                  | Post session 2 6.0±3.4                                         |
|                                                                  | Post session 3 5.5±1.3                                         |
|                                                                  | Post day 2 6.0±4.1                                             |
|                                                                  | EG <sub>1</sub> vs EG <sub>2</sub> vs EG <sub>3</sub> , p>0.05 |
|                                                                  | EG <sub>1</sub> vs EG <sub>2</sub> : ES=1.8                    |
|                                                                  | EG <sub>1</sub> vs EG <sub>3</sub> : ES=1.1                    |
|                                                                  | EG <sub>2</sub> vs EG <sub>3</sub> : ES=-0.1                   |
| Symptoms – Difficulty to expectorate in Visual Analog Scale (mm) | EG <sub>1</sub> : Post session 1 21.5±19.3                     |
|                                                                  | Post session 2 20.3±15.7                                       |
|                                                                  | Post session 3 56.3±40.1                                       |
|                                                                  | Post day 2 32.3±34.4                                           |
|                                                                  | EG <sub>2</sub> : Post session 1 57.0±39.6                     |
|                                                                  | Post session 2 67.0±39.6                                       |
|                                                                  | Post session 3 76.0                                            |
|                                                                  | Post day 2 58.0±52.3                                           |
|                                                                  | EG <sub>3</sub> : Post session 1 59.0±40.8                     |
|                                                                  | Post session 2 70.8±44.4                                       |
|                                                                  | Post session 3 49.0±33.9                                       |
|                                                                  | Post day 2 47.5±44.3                                           |
|                                                                  | EG <sub>1</sub> vs EG <sub>2</sub> vs EG <sub>3</sub> , p>0.05 |
|                                                                  | EG <sub>1</sub> vs EG <sub>2</sub> : ES=0.2                    |
|                                                                  | EG <sub>1</sub> vs EG <sub>3</sub> : ES=0.6                    |
|                                                                  | EG <sub>2</sub> vs EG <sub>3</sub> : ES=0.3                    |
| Impact of disease – CAT score                                    | EG <sub>1</sub> : Pre 23.8±2.8                                 |
|                                                                  | Post day 1 22.5±5.0                                            |
|                                                                  | Post day 2 21.3±5.5                                            |
|                                                                  | EG <sub>2</sub> : Pre 20.7±15.4                                |
|                                                                  | Post day 1 29.3±3.5                                            |
|                                                                  | Post day 2 27.0±8.5                                            |
|                                                                  | EG <sub>3</sub> : Pre 26.3±6.4                                 |
|                                                                  | Post day 1 24.8±6.9                                            |
|                                                                  | Post day 2 21.8±8.1                                            |
|                                                                  | EG <sub>1</sub> vs EG <sub>2</sub> vs EG <sub>3</sub> , p>0.05 |
|                                                                  | EG <sub>1</sub> vs EG <sub>2</sub> : ES=-0.9                   |
|                                                                  | EG <sub>1</sub> vs EG <sub>3</sub> : ES=0.3                    |
|                                                                  | EG <sub>2</sub> vs EG <sub>3</sub> : ES=0.9                    |
| Length of hospitalization – No of hours hospitalized             | EG <sub>1</sub> : 3.5 [2.5; 7.0]                               |
|                                                                  | EG <sub>2</sub> : 7.0 [1.0; 7.0]                               |
|                                                                  | EG <sub>3</sub> : 4.0 [3.0; 5.5]                               |

|                                                                 |                                                                                                                                                                         |                    |                                                                                                                                                       |                                                      |                                                                                                             |                                                                  |                                                                                                                                                                                                                                                                                                                                                                                                                                                          |
|-----------------------------------------------------------------|-------------------------------------------------------------------------------------------------------------------------------------------------------------------------|--------------------|-------------------------------------------------------------------------------------------------------------------------------------------------------|------------------------------------------------------|-------------------------------------------------------------------------------------------------------------|------------------------------------------------------------------|----------------------------------------------------------------------------------------------------------------------------------------------------------------------------------------------------------------------------------------------------------------------------------------------------------------------------------------------------------------------------------------------------------------------------------------------------------|
|                                                                 |                                                                                                                                                                         |                    |                                                                                                                                                       |                                                      |                                                                                                             | Patients' satisfaction – No of patients                          | EG <sub>1</sub> vs EG <sub>2</sub> vs EG <sub>3</sub> , p>0.05<br>Treatment worthily<br>Agree: EG <sub>1</sub> 1 vs EG <sub>2</sub> 2 vs EG <sub>3</sub> 2<br>Neutral: EG <sub>1</sub> 1 vs EG <sub>2</sub> 0 vs EG <sub>3</sub> 0<br>Disagree: EG <sub>1</sub> 2 vs EG <sub>2</sub> 0 vs EG <sub>3</sub> 2<br>EG <sub>1</sub> vs EG <sub>2</sub> : OR=0.3<br>EG <sub>1</sub> vs EG <sub>3</sub> : OR=0.2<br>EG <sub>2</sub> vs EG <sub>3</sub> : OR=0.5 |
| Johnson-Warrington et al., 2016 <sup>21</sup><br>United Kingdom | Patients admitted with AECOPD<br>EG: n=39; 38.5%♂;<br>67.6±8.5yrs; FEV <sub>1</sub> 40.5±15.7%pred<br>CG: n=39; 33.3%♂;<br>68.3±7.7yrs; FEV <sub>1</sub> 42.5±11.7%pred | EG: Home<br>CG: NS | EG: SPACE for COPD – education and home-based exercise program (walking, resistance training of upper and lower limbs)<br>CG: usual care (without PR) | EG: 10 weeks; 1 session plus 6 phone-calls<br>CG: NS | EG: face-to-face session – 30-45min; aerobic training – daily; resistance training – 3 times/week<br>CG: NS | Exercise capacity – ISWT (m)<br><br>Exercise capacity – ESWT (s) | Pre/Post change:<br>EG: 45.0 [0.0; 70.0], p<0.01<br>CG: 30.0 [0.0; 95.0], p<0.01<br>EG vs CG, p=0.769<br>Pre/Post change ≥ MCID:<br>EG 11.0 (50.0%) vs CG 9.0 (42.9%), p=0.648<br><br>Pre/Post change:<br>EG: 178.5 [-3.8; 443.5], p<0.01<br>CG: 155.0 [21.0; 618.5], p<0.01<br>EG vs CG, p=0.951<br>Pre/Post change ≥ MCID:<br>EG 10.0 (50.0%) vs CG 8.0 (47.1%), p=0.863                                                                               |
|                                                                 |                                                                                                                                                                         |                    |                                                                                                                                                       |                                                      |                                                                                                             | Symptoms: Anxiety – HADS score                                   | Pre/Post change:<br>EG: -0.3±3.5, p>0.05<br>CG: 0.3±3.5, p>0.05<br>EG vs CG, p=0.563<br>ES=-0.2<br>Pre/Post change ≥ MCID:<br>EG 9.0 (34.6%) vs CG 5.0 (17.2%), p=0.151                                                                                                                                                                                                                                                                                  |
|                                                                 |                                                                                                                                                                         |                    |                                                                                                                                                       |                                                      |                                                                                                             | Symptoms: Depression – HADS score                                | Pre/Post change:<br>EG: 0.5±3.3, p>0.05<br>CG: 0.8±4.3, p>0.05<br>EG vs CG, p=0.833<br>ES=-0.1<br>Pre/Post change ≥ MCID:<br>EG 8.0 (30.8%) vs CG 10.0 (34.5%), p=0.775                                                                                                                                                                                                                                                                                  |
|                                                                 |                                                                                                                                                                         |                    |                                                                                                                                                       |                                                      |                                                                                                             | HRQoL – CRQ score                                                | Dyspnoea score<br>Pre/Post change:                                                                                                                                                                                                                                                                                                                                                                                                                       |

|                                           |                                                                  |
|-------------------------------------------|------------------------------------------------------------------|
|                                           | EG: 1.1±1.3, p<0.01                                              |
|                                           | CG: 0.5±1.2, p<0.05                                              |
|                                           | EG vs CG, p=0.062                                                |
|                                           | ES=0.5                                                           |
|                                           | Pre/Post change ≥ MCID:                                          |
|                                           | EG 19.0 (63.3%) vs CG 11.0 (36.7%), p=0.039                      |
|                                           | Fatigue score                                                    |
|                                           | Pre/Post change:                                                 |
|                                           | EG: 1.0±1.2, p<0.01                                              |
|                                           | CG: 0.6±1.2, p<0.01                                              |
|                                           | EG vs CG, p=0.245                                                |
|                                           | ES=0.3                                                           |
|                                           | Pre/Post change ≥ MCID:                                          |
|                                           | EG 23.0 (76.7%) vs CG 17.0 (56.7%), p=0.104                      |
|                                           | Emotion score                                                    |
|                                           | Pre/Post change:                                                 |
|                                           | EG: 1.1±1.5, p<0.01                                              |
|                                           | CG: 0.4±1.6, p=0.216                                             |
|                                           | EG vs CG, p=0.077                                                |
|                                           | ES=0.5                                                           |
|                                           | Pre/Post change ≥ MCID:                                          |
|                                           | EG 19.0 (63.3%) vs CG 17.0 (56.7%), p=0.605                      |
|                                           | Mastery score                                                    |
|                                           | Pre/Post change:                                                 |
|                                           | EG: 1.4±1.5, p<0.01                                              |
|                                           | CG: 0.9±1.5, p<0.01                                              |
|                                           | EG vs CG, p=0.181                                                |
|                                           | ES=0.3                                                           |
|                                           | Pre/Post change ≥ MCID:                                          |
|                                           | EG 22.0 (73.3%) vs CG 22.0 (73.3%), p=1.000                      |
| Hospital readmission – No (%) of patients | At 3 months<br>EG 12 (30.8%) vs CG 13 (33.3%), p=0.808<br>OR=0.9 |
| Mortality – No of patients                | At 3 months<br>EG 0 vs CG 3, p=0.077<br>OR=0.1                   |
| Disease knowledge –                       | Pre/Post change:                                                 |

|                                                    |                                                                                                                                                                    |           |                                                                                                                                                        |                                              |                                                |                                                                                                                                                                                                                                                                                                                                    |                                                                                                                                                                                                                                                                                                                                                                                                                                                                                                                                                                                                                                                            |
|----------------------------------------------------|--------------------------------------------------------------------------------------------------------------------------------------------------------------------|-----------|--------------------------------------------------------------------------------------------------------------------------------------------------------|----------------------------------------------|------------------------------------------------|------------------------------------------------------------------------------------------------------------------------------------------------------------------------------------------------------------------------------------------------------------------------------------------------------------------------------------|------------------------------------------------------------------------------------------------------------------------------------------------------------------------------------------------------------------------------------------------------------------------------------------------------------------------------------------------------------------------------------------------------------------------------------------------------------------------------------------------------------------------------------------------------------------------------------------------------------------------------------------------------------|
|                                                    |                                                                                                                                                                    |           |                                                                                                                                                        |                                              |                                                | Bristol COPD Knowledge Questionnaire                                                                                                                                                                                                                                                                                               | EG: 3.9±7.1, p<0.05<br>CG: 2.1±7.2, p>0.05<br>EG vs CG, p=0.364<br>ES=0.3                                                                                                                                                                                                                                                                                                                                                                                                                                                                                                                                                                                  |
|                                                    |                                                                                                                                                                    |           |                                                                                                                                                        |                                              |                                                | Self-efficacy – Pulmonary Rehabilitation Adapted Index of Self-Efficacy                                                                                                                                                                                                                                                            | Pre/Post change:<br>EG: 0.5±9.5, p>0.05<br>CG: 2.3±8.7, p>0.05<br>EG vs CG, p=0.465<br>ES=-0.2                                                                                                                                                                                                                                                                                                                                                                                                                                                                                                                                                             |
| Torres-Sánchez et al., 2016 <sup>42</sup><br>Spain | Patients hospitalized with AECOPD<br>EG: n=24; 100.0%♂;<br>72.4±8.9yrs; FEV <sub>1</sub> 39.0%pred<br>CG: n=25; 92.0%♂;<br>73.7±7.1yrs; FEV <sub>1</sub> 41.0%pred | Inpatient | EG: usual care plus multimodal intervention program – breathing exercises, active range of motion exercises and muscle strengthening<br>CG: usual care | Until discharge<br>EG: ≥7 sessions<br>CG: NS | EG: 2 sessions/day, 30-45min/session<br>CG: NS | Exercise capacity – 2min step in place test (No of repetitions)<br><br>Muscle strength – Handgrip (N)<br><br>Muscle strength – Lower limb (N)<br><br>Lung function – FEV <sub>1</sub> (L)<br><br>Lung function – FEV <sub>1</sub> (%pred)<br><br>Vital signs and SpO <sub>2</sub> – SpO <sub>2</sub> (%)<br><br>Symptoms: Dyspnoea | Pre/Post change:<br>EG: 17.6±6.7, p<0.05<br>CG: 4.9±16.1, p>0.05<br>EG vs CG, p=0.013<br>ES=1.0<br><br>Pre/Post change:<br>EG: 23.3±52.0, p<0.05<br>CG: 0.3±3.7, p>0.05<br>EG vs CG, p=0.376<br>ES=0.6<br><br>Pre/Post change:<br>EG: 16.5±9.7, p<0.05<br>CG: -31.0±44.1, p<0.05<br>EG vs CG, p=0.038<br>ES=1.5<br><br>Pre/Post change:<br>EG: 0.6±0.9, p<0.05<br>CG: 0.3±0.6, p<0.05<br>EG vs CG, p=0.123<br>ES=0.4<br><br>Pre/Post change:<br>EG: 7.0±0.8, p<0.05<br>CG: 9.0±0.5, p<0.05<br>EG vs CG, p=0.264<br>ES=-3.0<br><br>Pre/Post change:<br>EG: 5.8±4.6, p<0.001<br>CG: -4.7±5.2, p<0.001<br>EG vs CG, p=0.412<br>ES=2.1<br><br>Pre/Post change: |

|                                   |                                                                                                                                                                                                                                                                                                                                                                                                                                                                                                                                                                                        |
|-----------------------------------|----------------------------------------------------------------------------------------------------------------------------------------------------------------------------------------------------------------------------------------------------------------------------------------------------------------------------------------------------------------------------------------------------------------------------------------------------------------------------------------------------------------------------------------------------------------------------------------|
| – modified Borg scale             | EG: 2.2±2.6, p<0.05<br>CG: 3.6±2.2, p<0.05<br>EG vs CG, p=0.785<br>ES=-0.6                                                                                                                                                                                                                                                                                                                                                                                                                                                                                                             |
| Symptoms: Anxiety – HADS score    | Pre/Post change:<br>EG: 3.8±3.6, p<0.05<br>CG: 0.8±2.9, p>0.05<br>EG vs CG, p=0.218<br>ES=0.9                                                                                                                                                                                                                                                                                                                                                                                                                                                                                          |
| Symptoms: Depression – HADS score | Pre/Post change:<br>EG: 4.2±2.5, p<0.05<br>CG: 0.2±3.5, p>0.05<br>EG vs CG, p=0.001<br>ES=1.3                                                                                                                                                                                                                                                                                                                                                                                                                                                                                          |
| HRQoL – EuroQol score             | Mobility score<br>Pre/Post change:<br>EG: 0.7±0.7, p<0.05<br>CG: 0.3±0.7, p>0.05<br>EG vs CG, p=0.124<br>ES=0.6<br>Self-care score<br>Pre/Post change:<br>EG: 0.6±0.8, p<0.05<br>CG: 0.3±0.5, p<0.05<br>EG vs CG, p=0.007<br>ES=0.5<br>Usual activities score<br>Pre/Post change:<br>EG: 0.7±0.8, p<0.05<br>CG: 0.3±0.7, p>0.05<br>EG vs CG, p=0.001<br>ES=0.5<br>Pain/discomfort score<br>Pre/Post change:<br>EG: 0.5±0.9, p<0.05<br>CG: 0.5±0.7, p<0.05<br>EG vs CG, p=0.381<br>ES=0.0<br>Anxiety/depression score<br>Pre/Post change:<br>EG: 0.6±0.7, p<0.05<br>CG: 0.5±0.5, p<0.05 |



|                                                    |                                                                                                                                                                   |                                               |                                                                                                                                                                                       |                                                                                                                                       |                                |                                                                                                                                                             |                                                                                                                                                                                                                                                                                                                                                                                                                                 |
|----------------------------------------------------|-------------------------------------------------------------------------------------------------------------------------------------------------------------------|-----------------------------------------------|---------------------------------------------------------------------------------------------------------------------------------------------------------------------------------------|---------------------------------------------------------------------------------------------------------------------------------------|--------------------------------|-------------------------------------------------------------------------------------------------------------------------------------------------------------|---------------------------------------------------------------------------------------------------------------------------------------------------------------------------------------------------------------------------------------------------------------------------------------------------------------------------------------------------------------------------------------------------------------------------------|
|                                                    |                                                                                                                                                                   |                                               |                                                                                                                                                                                       |                                                                                                                                       |                                |                                                                                                                                                             | EG vs CG, p=0.029<br>ES=0.2<br>Visual Analog Scale<br>Pre/Post change:<br>EG: 17.5±23.5, p<0.05<br>CG: 9.0±20.9, p>0.05<br>EG vs CG, p=0.040<br>ES=0.4<br>Length of hospitalization – No of days<br>EG 8.7±2.0 vs CG 8.8±2.0, p=0.801<br>ES=-0.1                                                                                                                                                                                |
| Basri et al., 2017 <sup>50</sup><br>Pakistan       | Patients hospitalized with AECOPD<br>EG: n=30; 60.0%♂; 55.0±3.8yrs; PEF 1.4<br>CG: n=30; 43.3%♂; 53.0±3.7yrs; PEF 1.4                                             | Inpatient                                     | EG: standard medical treatment plus active cycle breathing technique<br>CG: standard medical treatment, i.e., pharmacological treatment, smoking cessation and lifestyle modification | 2 weeks                                                                                                                               | EG: 30-40min/session<br>CG: NS | Lung function – PEF<br><br>Vital signs and SpO <sub>2</sub> – SpO <sub>2</sub> (%)<br><br>Symptoms: Dyspnoea – Visual Analog Scale                          | Median Pre/Post change: EG -5.4±4.0 vs CG 2.0±25.9, p<0.05<br>ES=-0.4<br><br>Median Pre/Post change: EG -3.6±3.2 vs CG -3.7±3.1, p<0.05<br>ES=0.0<br><br>Median Pre/Post change: EG 4.8±1.1 vs CG 0.4±0.6, p<0.05<br>ES=4.8                                                                                                                                                                                                     |
| Torres-Sánchez et al., 2017 <sup>41</sup><br>Spain | Patients admitted with AECOPD<br>EG: n=29; 75.9%♂; 75.7±6.3yrs; FEV <sub>1</sub> 42.4±10.6%pred<br>CG: n=29; 69.0%♂; 72.1±8.2yrs; FEV <sub>1</sub> 39.1±12.1%pred | From the second day of admission<br>Inpatient | EG: usual care plus exercise using a pedal exerciser<br>CG: usual care, i.e., systemic steroids, inhaled bronchodilators and oxygen                                                   | Until discharge<br>EG: dyspnoea and fatigue levels ≤6 on modified Borg scale<br>Progression: ↑time, velocity and resistance<br>CG: NA | NS                             | Exercise capacity – 30-seconds sit-to-stand test (No of repetitions)<br><br>Muscle strength – Lower limb (N)<br><br>Functionality – One-leg stance test (s) | EG: Pre 8.8±4.6 vs Post 13.7±4.8, p<0.05<br>CG: Pre 9.7±6.2 vs Post 9.1±3.2, p>0.05<br>Median Pre/Post change: EG 5.0 vs CG -0.5, p=0.409<br>ES=1.1<br><br>EG: Pre 103.6±11.4 vs Post 114.0±37.3, p<0.05<br>CG: Pre 101.5±13.5 vs Post 86.3±40.2, p<0.05<br>Median Pre/Post change: EG 10.5 vs CG -15.0, p=0.028<br>ES=0.9<br><br>Right<br>EG: Pre 4.1±6.8 vs Post 11.6±10.7, p<0.05<br>CG: Pre 5.2±7.5 vs Post 2.5±7.5, p<0.05 |

|                                                               |                                                                                                                                                                                    |                                                                   |                                                                                                                                                   |                                                                          |                                                                                                      |                                                                                                                                                                                |                                                                                                                                                                                                                                                                                                                                                                                                                                                                                                                                                                                                    |
|---------------------------------------------------------------|------------------------------------------------------------------------------------------------------------------------------------------------------------------------------------|-------------------------------------------------------------------|---------------------------------------------------------------------------------------------------------------------------------------------------|--------------------------------------------------------------------------|------------------------------------------------------------------------------------------------------|--------------------------------------------------------------------------------------------------------------------------------------------------------------------------------|----------------------------------------------------------------------------------------------------------------------------------------------------------------------------------------------------------------------------------------------------------------------------------------------------------------------------------------------------------------------------------------------------------------------------------------------------------------------------------------------------------------------------------------------------------------------------------------------------|
|                                                               |                                                                                                                                                                                    |                                                                   |                                                                                                                                                   |                                                                          |                                                                                                      |                                                                                                                                                                                | <p>Median Pre/Post change: EG 6.5 vs CG -2.5, p=0.013<br/>ES=1.2</p> <p>Left</p> <p>EG: Pre 2.9±5.2 vs Post 9.5±10.6, p&lt;0.05<br/>CG: Pre 3.6±5.0 vs Post 0.7±7.1, p&gt;0.05</p> <p>Median Pre/Post change: EG 7.0 vs CG -3.0, p=0.059<br/>ES=1.3</p> <p>Physical activity levels – No of steps/day</p> <p>EG: Pre 432.5±318.0 vs Post 1604.8±274.0<br/>CG: Pre 513.0±264.0 vs Post 941.8±367.0</p> <p>Median Pre/Post change: EG 1162.5 vs CG 451.0, p&lt;0.001<br/>ES=2.4</p> <p>Length of hospitalization – No of days hospitalized</p> <p>EG 12.5±1.9 vs CG 10.4±2.5, p=0.354<br/>ES=0.9</p> |
| <p>Janaudis-Ferreira et al., 2018<sup>59</sup><br/>Canada</p> | <p>Patients admitted with AECOPD<br/>EG: n=15; 53.3%♂; 71.0±11.0yrs; FEV<sub>1</sub> 45.3±7.4%pred<br/>CG: n=13; 30.8%♂; 74.0±10.0yrs; FEV<sub>1</sub> 34.7±3.8%pred</p>           | <p>Within 7 days of hospital admission<br/>Inpatient and Home</p> | <p>EG: usual care plus education<br/>CG: usual care, i.e., pharmacological treatment and oxygen therapy as required</p>                           | <p>EG: 2 weeks, 2 sessions<br/>CG: NS</p>                                | <p>EG: 30min/session<br/>CG: NA</p>                                                                  | <p>Disease knowledge – Bristol COPD Knowledge Questionnaire</p> <p>Disease knowledge – Lung Information Needs Questionnaire</p> <p>Patients' satisfaction – No of patients</p> | <p>Median Pre/Post change: EG 8.0±5.1 vs CG 3.4±4.9, p=0.018<br/>ES=0.9</p> <p>Median Pre/Post change: EG -2.4±2.7 vs CG -1.6±2.3, p=0.41<br/>ES=-0.3</p> <p>The intervention should be delivered to every patient: 14<br/>There is nothing to improve: 13</p>                                                                                                                                                                                                                                                                                                                                     |
| <p>Lopez-Lopez et al., 2018<sup>53</sup><br/>Spain</p>        | <p>Patients admitted with AECOPD<br/>EG<sub>1</sub>: n=14; 78.6%♂; 62.9±12.4yrs; FEV<sub>1</sub> 33.7±5.6%pred<br/>EG<sub>2</sub>: n=13; 77.0%♂; 64.0±10.5yrs; FEV<sub>1</sub></p> | <p>24 after admission<br/>Inpatient</p>                           | <p>EG<sub>1</sub>: standard medical treatment plus breathing retraining, cycling combined with neuromuscular stimulation, and active-assisted</p> | <p>Until discharge<br/>EG<sub>1</sub>: 50Hz<br/>EG<sub>2</sub>: 50Hz</p> | <p>EG<sub>1</sub>: 1 session/day; 45min/session<br/>EG<sub>2</sub>: 1 session/day; 45min/session</p> | <p>Functionality – 5-times sit-to-stand (s)</p>                                                                                                                                | <p>EG<sub>1</sub>: Pre 37.4±17.8 vs Post 30.1±16.5, p=0.003<br/>EG<sub>2</sub>: Pre 39.2±23.1 vs Post 23.1±15.8, p=0.002<br/>CG: Pre 35.8±25.1 vs Post 32.1±24.6, p=0.335<br/>EG<sub>1</sub> vs CG, p&lt;0.05; ES=-0.2<br/>EG<sub>2</sub> vs CG, p&lt;0.05; ES=-0.6</p>                                                                                                                                                                                                                                                                                                                            |

26.2±8.0%pred  
CG: n=12; 83.4%♂;  
64.3±8.5yrs; FEV<sub>1</sub>  
30.3±6.8%pred

stretches  
EG<sub>2</sub>: standard  
medical treatment  
plus breathing  
retraining, lower  
limb elastic band  
resistance exercises  
combined with  
neuromuscular  
stimulation, and  
active-assisted  
stretches  
CG: standard  
medical treatment,  
i.e., antibiotics,  
corticosteroids,  
inhaled  
bronchodilators and  
oxygen therapy

Functionality –  
London Chest Activity  
of Daily Living score

EG<sub>1</sub> vs EG<sub>2</sub>, p<0.05; ES=0.5  
Self-care score  
EG<sub>1</sub>: Pre 9.4±2.3 vs Post  
7.2±1.8, p=0.074  
EG<sub>2</sub>: Pre 9.4±2.3 vs Post  
7.5±1.4, p=0.104  
CG: Pre 8.2±2.0 vs Post 8.0±1.7,  
p=0.635  
EG<sub>1</sub> vs CG, p<0.05; ES=-1.1  
EG<sub>2</sub> vs CG, p<0.05; ES=-1.0  
EG<sub>1</sub> vs EG<sub>2</sub>, p>0.05; ES=-0.2  
Domestic score  
EG<sub>1</sub>: Pre 16.2±6.8 vs Post  
13.2±6.6, p=0.021  
EG<sub>2</sub>: Pre 16.5±6.8 vs Post  
12.0±7.5, p=0.037  
CG: Pre 15.0±7.1 vs Post  
14.8±8.3, p=0.506  
EG<sub>1</sub> vs CG, p<0.05; ES=-0.4  
EG<sub>2</sub> vs CG, p<0.05; ES=-0.6  
EG<sub>1</sub> vs EG<sub>2</sub>, p>0.05; ES=0.2  
Physical score  
EG<sub>1</sub>: Pre 5.1±1.7 vs Post  
2.8±1.5, p=0.002  
EG<sub>2</sub>: Pre 5.4±1.6 vs Post  
3.4±1.1, p=0.061  
CG: Pre 4.9±1.8 vs Post 3.7±2.0,  
p=0.471  
EG<sub>1</sub> vs CG, p<0.05; ES=-0.6  
EG<sub>2</sub> vs CG, p<0.05; ES=-0.5  
EG<sub>1</sub> vs EG<sub>2</sub>, p>0.05; ES=-0.2  
Leisure score  
EG<sub>1</sub>: Pre 5.7±1.5 vs Post  
3.5±1.6, p=0.017  
EG<sub>2</sub>: Pre 5.3±1.9 vs Post  
3.7±1.2, p=0.012  
CG: Pre 5.5±1.7 vs Post 5.8±0.9,  
p=0.325  
EG<sub>1</sub> vs CG, p<0.05; ES=-1.7  
EG<sub>2</sub> vs CG, p<0.05; ES=-1.3  
EG<sub>1</sub> vs EG<sub>2</sub>, p>0.05; ES=-0.4  
Total score

|                                                    |                                                                                                                                                                                                                                |           |                                                                                                                                                                                     |                                                                                  |                                                                                                        |                                                     |                                                                                                                                                                                                                                                                                                                                              |
|----------------------------------------------------|--------------------------------------------------------------------------------------------------------------------------------------------------------------------------------------------------------------------------------|-----------|-------------------------------------------------------------------------------------------------------------------------------------------------------------------------------------|----------------------------------------------------------------------------------|--------------------------------------------------------------------------------------------------------|-----------------------------------------------------|----------------------------------------------------------------------------------------------------------------------------------------------------------------------------------------------------------------------------------------------------------------------------------------------------------------------------------------------|
|                                                    |                                                                                                                                                                                                                                |           |                                                                                                                                                                                     |                                                                                  |                                                                                                        |                                                     | <p>EG<sub>1</sub>: Pre 35.1±7.0 vs Post 23.7±10.0, p=0.001</p> <p>EG<sub>2</sub>: Pre 32.2±9.5 vs Post 19.9±12.2, p=0.013</p> <p>CG: Pre 30.1±10.8 vs Post 28.1±13.6, p=0.759</p> <p>EG<sub>1</sub> vs CG, p&lt;0.05; ES=-0.9</p> <p>EG<sub>2</sub> vs CG, p&lt;0.05; ES=-0.9</p> <p>EG<sub>1</sub> vs EG<sub>2</sub>, p&gt;0.05; ES=0.1</p> |
|                                                    |                                                                                                                                                                                                                                |           |                                                                                                                                                                                     |                                                                                  |                                                                                                        | Symptoms: Dyspnoea – modified Borg scale            | <p>EG<sub>1</sub>: Pre 4.9±3.1 vs Post 2.8±1.2, p=0.003</p> <p>EG<sub>2</sub>: Pre 5.2±3.5 vs Post 1.8±0.7, p=0.031</p> <p>CG: Pre 5.2±3.5 vs Post 3.2±3.0, p=0.024</p> <p>EG<sub>1</sub> vs CG, p&gt;0.05; ES=0.0</p> <p>EG<sub>2</sub> vs CG, p&gt;0.05; ES=-0.5</p> <p>EG<sub>1</sub> vs EG<sub>2</sub>, p&gt;0.05; ES=0.5</p>            |
|                                                    |                                                                                                                                                                                                                                |           |                                                                                                                                                                                     |                                                                                  |                                                                                                        | Symptoms: Fatigue – Fatigue Severity Scale score    | <p>EG<sub>1</sub>: Pre 5.8±3.1 vs Post 3.8±2.6, p=0.001</p> <p>EG<sub>2</sub>: Pre 6.2±2.4 vs Post 2.1±1.2, p&lt;0.001</p> <p>CG: Pre 6.2±2.4 vs Post 4.2±3.2, p=0.147</p> <p>EG<sub>1</sub> vs CG, p&lt;0.05; ES=0.0</p> <p>EG<sub>2</sub> vs CG, p&lt;0.05; ES=-0.9</p> <p>EG<sub>1</sub> vs EG<sub>2</sub>, p&lt;0.05; ES=0.9</p>         |
|                                                    |                                                                                                                                                                                                                                |           |                                                                                                                                                                                     |                                                                                  |                                                                                                        | Length of hospitalization – No of days hospitalized | <p>EG<sub>1</sub> 9.0±2.5 vs EG<sub>2</sub> 10.5±4.3 vs CG 9.2±3.2, p&gt;0.05</p> <p>EG<sub>1</sub> vs CG: ES=-0.1</p> <p>EG<sub>2</sub> vs CG: ES=0.3</p> <p>EG<sub>1</sub> vs EG<sub>2</sub>: ES=-0.4</p>                                                                                                                                  |
| Torres-Sanchez et al., 2018 <sup>51</sup><br>Spain | Patients admitted with AECOPD<br>EG <sub>1</sub> : n=30; 93.3%♂ <sup>1</sup> ;<br>75.1±8.7yrs; FEV <sub>1</sub> 31.3±5.3%pred<br>EG <sub>2</sub> : n=30; 86.7%♂ <sup>1</sup> ;<br>70.1±10.6yrs; FEV <sub>1</sub> 30.1±8.3%pred | Inpatient | EG <sub>1</sub> : standard medical treatment plus relaxation exercises, pursed lips breathing, active expiration and active range of motion exercises<br>EG <sub>2</sub> : standard | Until discharge<br>EG <sub>2</sub> : Progression: ↑time, velocity and resistance | EG <sub>1</sub> : 1 session/day; 30-40min/session<br>EG <sub>2</sub> : 1 session/day; 30-40min/session | Lung function – FEV <sub>1</sub> (%pred)            | <p>EG<sub>1</sub>: Pre 31.3±5.3 vs Post 38.6±10.3, p=0.002</p> <p>EG<sub>2</sub>: Pre 30.1±8.3 vs Post 37.5±13.1, p=0.033</p> <p>CG: Pre 30.4±10.8 vs Post 35.1±14.5, p=0.025</p> <p>EG<sub>1</sub> vs CG, p&gt;0.05; ES=0.2</p> <p>EG<sub>2</sub> vs CG, p&gt;0.05; ES=0.2</p> <p>EG<sub>1</sub> vs EG<sub>2</sub>, p&gt;0.05; ES=0.0</p>   |

---

CG: n=30; 80.0%♂;  
71.1±9.4yrs; FEV<sub>1</sub>  
30.4±10.8%pred

medical treatment  
plus upper and  
lower limbs  
resistance training  
CG: standard  
medical treatment,  
i.e., antibiotics,  
corticosteroids,  
inhaled  
bronchodilators and  
oxygen therapy

Symptoms: Dyspnoea  
– modified Borg scale

EG<sub>1</sub>: Pre 4.9±2.0 vs Post  
2.7±3.5, p=0.007  
EG<sub>2</sub>: Pre 5.8±2.8 vs Post  
1.7±1.9, p<0.001  
CG: Pre 6.1±2.9 vs Post 3.9±3.4,  
p<0.001  
EG<sub>1</sub> vs CG, p>0.05; ES=0.0  
EG<sub>2</sub> vs CG, p<0.05; ES=-0.7  
EG<sub>1</sub> vs EG<sub>2</sub>, p>0.05; ES=0.7

HRQoL – EuroQol  
score

Mobility score  
EG<sub>1</sub>: Pre 1.9±0.6 vs Post  
1.2±0.4, p<0.001  
EG<sub>2</sub>: Pre 1.6±0.4 vs Post  
1.2±0.5, p<0.001  
CG: Pre 1.9±0.5 vs Post 1.5±0.6,  
p=0.003  
EG<sub>1</sub> vs CG, p<0.05; ES=-0.6  
EG<sub>2</sub> vs CG, p<0.05; ES=-0.2  
EG<sub>1</sub> vs EG<sub>2</sub>, p>0.05; ES=-0.5  
Self-care score  
EG<sub>1</sub>: Pre 1.7±0.7 vs Post  
1.0±0.0, p<0.001  
EG<sub>2</sub>: Pre 1.9±0.8 vs Post  
1.1±0.7, p=0.011  
CG: Pre 1.9±0.7 vs Post 1.5±0.8,  
p=0.001  
EG<sub>1</sub> vs CG, p<0.05; ES=-0.4  
EG<sub>2</sub> vs CG, p<0.05; ES=-0.5  
EG<sub>1</sub> vs EG<sub>2</sub>, p>0.05; ES=0.2  
Usual activity score  
EG<sub>1</sub>: Pre 1.9±0.9 vs Post  
1.4±0.8, p=0.030  
EG<sub>2</sub>: Pre 2.1±0.8 vs Post  
1.0±0.8, p<0.001  
CG: Pre 2.3±0.7 vs Post 1.9±0.8,  
p=0.018  
EG<sub>1</sub> vs CG, p<0.05; ES=-0.2  
EG<sub>2</sub> vs CG, p<0.05; ES=-0.9  
EG<sub>1</sub> vs EG<sub>2</sub>, p<0.05; ES=0.7  
Pain/discomfort score  
EG<sub>1</sub>: Pre 1.5±0.6 vs Post  
1.2±0.4, p=0.073

---

EG<sub>2</sub>: Pre 1.3±0.5 vs Post 1.3±0.5, p=1.000  
 CG: Pre 1.8±0.5 vs Post 1.4±0.5, p<0.001  
 EG<sub>1</sub> vs CG, p>0.05; ES=0.3  
 EG<sub>2</sub> vs CG, p>0.05; ES=0.8  
 EG<sub>1</sub> vs EG<sub>2</sub>, p>0.05; ES=-0.5  
 Anxiety/depression score  
 EG<sub>1</sub>: Pre 2.8±0.7 vs Post 1.8±0.8, p<0.001  
 EG<sub>2</sub>: Pre 2.1±0.5 vs Post 0.8±0.6, p<0.001  
 CG: Pre 2.0±0.8 vs Post 2.1±0.8, p=1.000  
 EG<sub>1</sub> vs CG, p>0.05; ES=-1.3  
 EG<sub>2</sub> vs CG, p<0.05; ES=-2.1  
 EG<sub>1</sub> vs EG<sub>2</sub>, p>0.05; ES=0.5  
 Index  
 EG<sub>1</sub>: Pre 0.4±0.4 vs Post 0.8±0.2, p<0.001  
 EG<sub>2</sub>: Pre 0.4±0.5 vs Post 0.9±0.4, p<0.001  
 CG: Pre 0.3±0.4 vs Post 0.6±0.4, p<0.001  
 EG<sub>1</sub> vs CG, p>0.05; ES=0.2  
 EG<sub>2</sub> vs CG, p<0.05; ES=0.4  
 EG<sub>1</sub> vs EG<sub>2</sub>, p>0.05; ES=-0.2  
 Visual Analog Scale  
 EG<sub>1</sub>: Pre 50.0±9.8 vs Post 78.3±15.8, p<0.001  
 EG<sub>2</sub>: Pre 43.8±1.5 vs Post 72.9±14.3, p<0.001  
 CG: Pre 42.5±17.0 vs Post 56.2±21.6, p<0.001  
 EG<sub>1</sub> vs CG, p<0.05; ES=0.9  
 EG<sub>2</sub> vs CG, p<0.05; ES=1.0  
 EG<sub>1</sub> vs EG<sub>2</sub>, p>0.05; ES=-0.1  
 Length of hospitalization – No of days hospitalized  
 EG<sub>1</sub> 9.0±2.5 vs EG<sub>2</sub> 10.5±4.3 vs CG 9.2±3.2, p=0.27  
 EG<sub>1</sub> vs CG: ES=-0.1  
 EG<sub>2</sub> vs CG: ES=0.3  
 EG<sub>1</sub> vs EG<sub>2</sub>: ES=-0.4



38.8±17.9%pred  
CG: n=22;  
71.4±9.9yrs; FEV<sub>1</sub>  
34.5±19.6%pred

plus neuromuscular  
stimulation and  
lower limbs  
exercises plus self-  
management  
programme  
CG: standard  
medical treatment,  
i.e., bronchodilators,  
inhaled  
corticosteroids and  
antibiotics

Lung function – FEV<sub>1</sub>  
(%pred)

Functionality – 5-  
times sit-to-stand (s)

Functionality –  
London Chest Activity  
of Daily Living score

EG<sub>1</sub> vs EG<sub>2</sub>, p>0.05; ES=0.0  
EG<sub>1</sub>: Pre 36.6±16.8 vs Post  
43.0±12.5, p=0.003  
EG<sub>2</sub>: Pre 38.8±17.9 vs Post  
45.7±17.9, p=0.001  
CG: Pre 34.5±19.6 vs Post  
41.3±21.1, p=0.029  
EG<sub>1</sub> vs CG, p>0.05; ES=0.0  
EG<sub>2</sub> vs CG, p>0.05; ES=0.0  
EG<sub>1</sub> vs EG<sub>2</sub>, p>0.05; ES=0.0  
EG<sub>1</sub>: Pre 38.9±18.8 vs Post  
29.1±20.5, p=0.033  
EG<sub>2</sub>: Pre 36.1±19.7 vs Post  
24.5±6.8, p=0.025  
CG: Pre 39.1±20.5 vs Post  
31.3±11.2, p=0.195  
EG<sub>1</sub> vs CG, p<0.05; ES=-0.1  
EG<sub>2</sub> vs CG, p<0.05; ES=-0.2  
EG<sub>1</sub> vs EG<sub>2</sub>, p>0.05; ES=0.1  
Personal care score  
EG<sub>1</sub>: Pre 10.0±4.6 vs Post  
6.1±4.6, p=0.003  
EG<sub>2</sub>: Pre 9.9±4.9 vs Post  
6.1±4.5, p=0.004  
CG: Pre 11.1±4.5 vs Post  
9.1±3.8, p=0.025  
EG<sub>1</sub> vs CG, p<0.05; ES=-0.4  
EG<sub>2</sub> vs CG, p>0.05; ES=-0.4  
EG<sub>1</sub> vs EG<sub>2</sub>, p>0.05; ES=0.0  
Domestic activities score  
EG<sub>1</sub>: Pre 7.9±9.8 vs Post  
6.0±6.5, p=0.011  
EG<sub>2</sub>: Pre 6.9±9.8 vs Post  
5.1±6.1, p=0.032  
CG: Pre 7.9±11.5 vs Post  
9.4±7.9, p=0.258  
EG<sub>1</sub> vs CG, p<0.05; ES=-0.4  
EG<sub>2</sub> vs CG, p>0.05; ES=-0.4  
EG<sub>1</sub> vs EG<sub>2</sub>, p>0.05; ES=0.0  
Physical activities score  
EG<sub>1</sub>: Pre 5.6±1.9 vs Post  
3.8±1.2, p=0.004



EG<sub>2</sub>: Pre 5.7±1.7 vs Post 3.9±1.5, p<0.001  
 CG: Pre 6.4±2.7 vs Post 5.3±3.5, p=0.354  
 EG<sub>1</sub> vs CG, p<0.05; ES=-0.3  
 EG<sub>2</sub> vs CG, p>0.05; ES=-0.3  
 EG<sub>1</sub> vs EG<sub>2</sub>, p>0.05; ES=0.1  
 Leisure activities score  
 EG<sub>1</sub>: Pre 6.7±2.7 vs Post 4.3±2.4, p=0.001  
 EG<sub>2</sub>: Pre 6.0±2.4 vs Post 3.6±2.3, p=0.001  
 CG: Pre 7.0±2.9 vs Post 5.9±2.7, p=0.035  
 EG<sub>1</sub> vs CG, p>0.05, ES=-0.5  
 EG<sub>2</sub> vs CG, p>0.05; ES=-0.5  
 EG<sub>1</sub> vs EG<sub>2</sub>, p>0.05; ES=0.0  
 Total score  
 EG<sub>1</sub>: Pre 30.1±12.9 vs Post 20.9±9.5, p=0.002  
 EG<sub>2</sub>: Pre 28.2±12.2 vs Post 18.7±9.7, p<0.001  
 CG: Pre 32.4±14.3 vs Post 28.7±11.6, p=0.985  
 EG<sub>1</sub> vs CG, p<0.05; ES=-0.4  
 EG<sub>2</sub> vs CG, p>0.05; ES=-0.5  
 EG<sub>1</sub> vs EG<sub>2</sub>, p>0.05; ES=0.0  
 Motor score  
 EG<sub>1</sub>: Pre 85.8±10.5 vs Post 91.6±11.2, p=0.012  
 EG<sub>2</sub>: Pre 79.7±12.1 vs Post 85.3±11.8, p=0.017  
 CG: Pre 81.2±13.8 vs Post 77.8±2.5, p=0.321  
 EG<sub>1</sub> vs CG, p<0.05; ES=0.9  
 EG<sub>2</sub> vs CG, p>0.05; ES=0.8  
 EG<sub>1</sub> vs EG<sub>2</sub>, p>0.05; ES=0.0  
 Cognitive score  
 EG<sub>1</sub>: Pre 34.5±1.3 vs Post 35.2±0.7, p=0.036  
 EG<sub>2</sub>: Pre 33.6±2.2 vs Post 34.0±0.7, p=0.042

Functionality –  
 Functional  
 Independence  
 Measure score

|                                          |                                                              |
|------------------------------------------|--------------------------------------------------------------|
|                                          | CG: Pre 33.5±5.0 vs Post 34.1±1.9, p=0.604                   |
|                                          | EG <sub>1</sub> vs CG, p>0.05; ES=0.0                        |
|                                          | EG <sub>2</sub> vs CG, p>0.05; ES=-0.1                       |
|                                          | EG <sub>1</sub> vs EG <sub>2</sub> , p>0.05; ES=0.2          |
|                                          | Total score                                                  |
|                                          | EG <sub>1</sub> : Pre 120.3±11.1 vs Post 126.6±12.2, p=0.041 |
|                                          | EG <sub>2</sub> : Pre 113.3±13.3 vs Post 119.3±12.4, p=0.023 |
|                                          | CG: Pre 114.6±17.0 vs Post 111.8±3.0, p=0.459                |
|                                          | EG <sub>1</sub> vs CG, p<0.05; ES=0.8                        |
|                                          | EG <sub>2</sub> vs CG, p>0.05; ES=0.7                        |
|                                          | EG <sub>1</sub> vs EG <sub>2</sub> , p>0.05; ES=0.0          |
| Symptoms: Dyspnoea – modified Borg scale | EG <sub>1</sub> : Pre 5.1±2.6 vs Post 2.6±2.3, p=0.006       |
|                                          | EG <sub>2</sub> : Pre 4.2±3.0 vs Post 2.9±3.4, p=0.004       |
|                                          | CG: Pre 5.9±2.6 vs Post 3.1±2.3, p=0.011                     |
|                                          | EG <sub>1</sub> vs CG, p>0.05; ES=0.1                        |
|                                          | EG <sub>2</sub> vs CG, p>0.05; ES=0.5                        |
|                                          | EG <sub>1</sub> vs EG <sub>2</sub> , p>0.05, ES=-0.4         |
| HRQoL – EuroQol score                    | Mobility score                                               |
|                                          | EG <sub>1</sub> : Pre 1.8±0.6 vs Post 1.4±0.6, p=0.001       |
|                                          | EG <sub>2</sub> : Pre 1.9±0.6 vs Post 1.2±0.6, p=0.008       |
|                                          | CG: Pre 1.9±0.5 vs Post 1.6±0.6, p=0.073                     |
|                                          | EG <sub>1</sub> vs CG, p<0.05; ES=-0.2                       |
|                                          | EG <sub>2</sub> vs CG, p<0.05; ES=-0.5                       |
|                                          | EG <sub>1</sub> vs EG <sub>2</sub> , p<0.05; ES=0.3          |
|                                          | Personal care score                                          |
|                                          | EG <sub>1</sub> : Pre 2.0±0.7 vs Post 1.4±0.7, p<0.001       |
|                                          | EG <sub>2</sub> : Pre 1.9±0.8 vs Post 1.2±0.8, p<0.001       |
|                                          | CG: Pre 2.0±0.8 vs Post 1.7±0.8, p=0.101                     |
|                                          | EG <sub>1</sub> vs CG, p<0.05; ES=-0.4                       |

EG<sub>2</sub> vs CG,  $p < 0.05$ ; ES = -0.6  
EG<sub>1</sub> vs EG<sub>2</sub>,  $p > 0.05$ ; ES = 0.1  
Daily activities score  
EG<sub>1</sub>: Pre 2.2±0.8 vs Post  
1.6±1.0,  $p = 0.184$   
EG<sub>2</sub>: Pre 2.0±0.8 vs Post  
1.3±0.8,  $p < 0.001$   
CG: Pre 2.2±0.8 vs Post 1.8±0.9,  
 $p = 0.062$   
EG<sub>1</sub> vs CG,  $p < 0.05$ ; ES = -0.3  
EG<sub>2</sub> vs CG,  $p < 0.05$ ; ES = -0.4  
EG<sub>1</sub> vs EG<sub>2</sub>,  $p > 0.05$ ; ES = 0.1  
Pain score  
EG<sub>1</sub>: Pre 1.6±0.8 vs Post  
1.3±0.7,  $p = 0.208$   
EG<sub>2</sub>: Pre 1.7±0.7 vs Post  
1.3±0.7,  $p = 0.027$   
CG: Pre 1.7±0.8 vs Post 1.2±0.8,  
 $p = 0.056$   
EG<sub>1</sub> vs CG,  $p > 0.05$ ; ES = 0.2  
EG<sub>2</sub> vs CG,  $p > 0.05$ ; ES = 0.1  
EG<sub>1</sub> vs EG<sub>2</sub>,  $p > 0.05$ ; ES = 0.1  
Anxiety/depression score  
EG<sub>1</sub>: Pre 1.8±0.8 vs Post  
1.4±0.9,  $p = 0.326$   
EG<sub>2</sub>: Pre 1.9±0.8 vs Post  
1.2±0.7,  $p < 0.001$   
CG: Pre 1.9±0.8 vs Post 1.5±0.8,  
 $p = 0.007$   
EG<sub>1</sub> vs CG,  $p > 0.05$ ; ES = 0.0  
EG<sub>2</sub> vs CG,  $p < 0.05$ ; ES = -0.4  
EG<sub>1</sub> vs EG<sub>2</sub>,  $p > 0.05$ ; ES = 0.4  
Visual Analog Scale  
EG<sub>1</sub>: Pre 54.9±16.6 vs Post  
65.8±17.8,  $p = 0.395$   
EG<sub>2</sub>: Pre 46.6±20.7 vs Post  
70.6±23.78,  $p < 0.001$   
CG: Pre 46.5±21.3 vs Post  
56.1±22.7,  $p < 0.001$   
EG<sub>1</sub> vs CG,  $p > 0.05$ ; ES = 0.1  
EG<sub>2</sub> vs CG,  $p < 0.05$ ; ES = 0.6  
EG<sub>1</sub> vs EG<sub>2</sub>,  $p < 0.05$ ; ES = -0.7

|                                                  |                                                                                                                                                                                                                                                |                                               |                                                                                                                                                                                                                                                                                                                                                                                                   |                                                                                    |                                                                                                   | Length of hospitalization – No of days hospitalized | EG <sub>1</sub> 9.5±3.0 vs EG <sub>2</sub> 9.5±5.7 vs CG 9.5±4.2, p>0.05<br>EG <sub>1</sub> vs CG: ES=0.0<br>EG <sub>2</sub> vs CG: ES=0.0<br>EG <sub>1</sub> vs EG <sub>2</sub> : ES=0.0                                                                                                                                                                                                                                                                                                                                            |
|--------------------------------------------------|------------------------------------------------------------------------------------------------------------------------------------------------------------------------------------------------------------------------------------------------|-----------------------------------------------|---------------------------------------------------------------------------------------------------------------------------------------------------------------------------------------------------------------------------------------------------------------------------------------------------------------------------------------------------------------------------------------------------|------------------------------------------------------------------------------------|---------------------------------------------------------------------------------------------------|-----------------------------------------------------|--------------------------------------------------------------------------------------------------------------------------------------------------------------------------------------------------------------------------------------------------------------------------------------------------------------------------------------------------------------------------------------------------------------------------------------------------------------------------------------------------------------------------------------|
| Lopez-Lopez et al., 2019b <sup>45</sup><br>Spain | Patients admitted with AECOPD<br>EG <sub>1</sub> : n=15;<br>71.7±5.6yrs; FEV <sub>1</sub> 36.3±8.3%pred<br>EG <sub>2</sub> : n=17;<br>68.6±8.4yrs; FEV <sub>1</sub> 34.2±26.4%pred<br>CG: n=16;<br>68.5±8.9yrs; FEV <sub>1</sub> 31.7±6.1%pred | From the second day of admission<br>Inpatient | EG <sub>1</sub> : standard medical and pharmacological treatment plus cycling combined with neuromuscular stimulation<br>EG <sub>2</sub> : standard medical and pharmacological treatment plus cycling combined with neuromuscular stimulation<br>CG: standard medical and pharmacological treatment, i.e., systemic steroids, inhaled bronchodilators, oxygen, oral prednisolone and antibiotics | Until discharge (5–7 sessions)<br>EG <sub>1</sub> : 50Hz<br>EG <sub>2</sub> : 50Hz | EG <sub>1</sub> : 1 session/day; 30min/session<br>EG <sub>2</sub> : 2 sessions/day; 30min/session | Muscle strength – knee extension (N)                | Pre/Post change<br>EG <sub>1</sub> : 24.0±3.0, p<0.05<br>EG <sub>2</sub> : 59.4±94.6, p<0.001<br>CG: 9.5±21.6, p>0.05<br>EG <sub>1</sub> vs CG, p<0.05; ES=0.9<br>EG <sub>2</sub> vs CG, p<0.05; ES=0.7<br>EG <sub>1</sub> vs EG <sub>2</sub> , p<0.05; ES=-0.5                                                                                                                                                                                                                                                                      |
|                                                  |                                                                                                                                                                                                                                                |                                               |                                                                                                                                                                                                                                                                                                                                                                                                   |                                                                                    |                                                                                                   | Functionality – 5-times sit-to-stand (s)            | Pre/Post change<br>EG <sub>1</sub> : 19.6±11.9, p<0.05<br>EG <sub>2</sub> : 23.5±3.5, p<0.05<br>CG: 16.5±13.9, p<0.05<br>EG <sub>1</sub> vs CG, p<0.05; ES=0.2<br>EG <sub>2</sub> vs CG, p<0.05; ES=0.7<br>EG <sub>1</sub> vs EG <sub>2</sub> , p>0.05; ES=-0.5                                                                                                                                                                                                                                                                      |
|                                                  |                                                                                                                                                                                                                                                |                                               |                                                                                                                                                                                                                                                                                                                                                                                                   |                                                                                    |                                                                                                   | Symptoms: Dyspnoea – modified Borg scale            | Pre/Post change<br>At rest<br>EG <sub>1</sub> : 1.2±3.0, p=0.041<br>EG <sub>2</sub> : 2.4±2.7, p<0.05<br>CG: 1.3±3.2, p=0.037<br>EG <sub>1</sub> vs CG, p>0.05; ES=0.0<br>EG <sub>2</sub> vs CG, p<0.05; ES=0.4<br>EG <sub>1</sub> vs EG <sub>2</sub> , p<0.05; ES=-0.4<br>Post exercise<br>EG <sub>1</sub> : 0.3±1.6, p<0.05<br>EG <sub>2</sub> : 1.2±3.1, p<0.05<br>CG: 0.8±2.3, p<0.05<br>EG <sub>1</sub> vs CG, p>0.05; ES=-0.2<br>EG <sub>2</sub> vs CG, p<0.05; ES=0.2<br>EG <sub>1</sub> vs EG <sub>2</sub> , p<0.05; ES=-0.4 |
|                                                  |                                                                                                                                                                                                                                                |                                               |                                                                                                                                                                                                                                                                                                                                                                                                   |                                                                                    |                                                                                                   | Symptoms: Perceived exertion – Visual Analog Scale  | Pre/Post change<br>At rest<br>EG <sub>1</sub> : 3.1±4.6, p<0.05<br>EG <sub>2</sub> : 3.2±4.5, p<0.05<br>CG: 2.4±2.4, p>0.05<br>EG <sub>1</sub> vs CG, p<0.05; ES=0.2<br>EG <sub>2</sub> vs CG, p<0.05; ES=0.2                                                                                                                                                                                                                                                                                                                        |



|                                           |                                                                                                                                                                                                                                                                                                                                                                                                                                                 |
|-------------------------------------------|-------------------------------------------------------------------------------------------------------------------------------------------------------------------------------------------------------------------------------------------------------------------------------------------------------------------------------------------------------------------------------------------------------------------------------------------------|
| Impact of disease – CAT score             | <p>EG<sub>1</sub>: Pre 15.8±0.5; change at 2 months -3.5±0.6, p&lt;0.01; change at 6 months -3.6±0.6, p&lt;0.01</p> <p>EG<sub>2</sub>: Pre 15.2±0.6; change at 2 months -2.1±0.6, p&lt;0.01; change at 6 months -2.2±0.6, p&lt;0.01</p> <p>Change at 2 months: EG<sub>1</sub> vs EG<sub>2</sub> -1.4, 95%CI (-3.4-0.6), p=0.17; ES=-2.3</p> <p>Change at 6 months: EG<sub>1</sub> vs EG<sub>2</sub> -1.4, 95%CI (-3.5-0.6), p=0.18; ES=-2.3</p> |
| Hospital readmission – No of readmissions | <p>At 12 months – all</p> <p>EG<sub>1</sub> 128 vs EG<sub>2</sub> 90</p> <p>IRR 1.0 95%CI (0.7-1.7), p=0.85</p> <p>At 12 months – respiratory related</p> <p>EG<sub>1</sub> 86 vs EG<sub>2</sub> 65</p> <p>OR 0.7 95%CI (0.3-1.4), p=0.31</p>                                                                                                                                                                                                   |
| Mortality – No (%) of patients            | <p>At 12 months</p> <p>EG<sub>1</sub> 9 (13%) vs EG<sub>2</sub> 6 (10%)</p> <p>OR 1.1 95%CI (0.3-3.4), p=0.92</p>                                                                                                                                                                                                                                                                                                                               |

Data are presented as mean±standard deviation or median [interquartile range], unless otherwise stated.

Legend: 1RM, one-repetition maximum; 6MWD, 6-minute walk distance; 6MWT, 6-minute walk test; AECOPD, acute exacerbation of chronic obstructive pulmonary disease; bpm, beats per minute; CAT, COPD assessment test; CG, control group; CPET, cardiopulmonary exercise test; cpm, cycles per minute; CRQ, chronic respiratory questionnaire; EG, experimental group; ES, effect size; ESWT, endurance shuttle walk test; FEV<sub>1</sub>, forced expiratory volume in one second; FVC, forced vital capacity; HADS, hospital anxiety and depression scale; HR, Hazard ratio; HRQoL, health-related quality of life; IRR, incident rate ratio; ISWT, incremental shuttle walk test; MCID, minimal clinical important difference; MRC, medical research council dyspnoea questionnaire; mMRC, modified medical research council dyspnoea questionnaire; NA, not applicable; NS, not stated; OR, odds ratio; PEF, peak expiratory flow; PEP, positive expiratory pressure; PR, pulmonary rehabilitation; QMVC, quadriceps maximal voluntary contraction; RICU, respiratory intensive care unit; SF-12, the 12-item short form health survey; SF-36, the 36-item short form health survey; SGRQ, St. George's respiratory questionnaire; SpO<sub>2</sub>, peripheral oxygen saturation; VO<sub>2</sub>, oxygen uptake.
